# Supplementary material
Source: ML conference proceedings conference paper supplement (https://aclanthology.org/D19-1305)
Supplement: Attachment [file D19-1305.Attachment.zip]

# Word Order Evaluation

## Definitions

- A dependency relation is head-initial (HI) if its head precedes the dependent in the linear order of a sentence. E.g., *walk<sub>head</sub> slowly<sub>dep</sub>*.
- A dependency relation is head-final (HF) if its head follows the dependent. E.g., *an<sub>dep</sub> apple<sub>head</sub>*.

## Column Name Explanation

- count: number of deprel occurrences in the test data;
- found-m: number of found deprels in the model prediction;
- %: found-m in percentage;
- HI: a count of how many relations are head-initial in the test data;
- HI%: HI in percentage;
- HI-m: a count of matches between the model prediction and HI;
- HI-m%: HI-m in percentage w.r.t. HI=100%;
- HF: a count of how many relations are head-final in the test data;
- HF%: HF in percentage;
- HF-m: a count of matches between the model prediction and HF;
- HF-m%: HF-m in percentage w.r.t. HF=100%.

For each language, two tables are supplied: with exact match (head and dependent are in the correct order, and the distance between them is the same in gold and prediction) and approximate match (head and dependent are in the correct order but there is a one-token difference between gold and prediction).

| deprel       | count | found-m | %    | HI    | HI%  | HI-m | HI-m% | HF   | HF%  | HF-m | HF-m% |
|--------------|-------|---------|------|-------|------|------|-------|------|------|------|-------|
| nmod         | 6184  | 2629    | 42.5 | 5866  | 94.9 | 2501 | 42.6  | 318  | 5.1  | 128  | 40.3  |
| case         | 4320  | 1718    | 39.8 | 31    | 0.7  | 3    | 9.7   | 4289 | 99.3 | 1715 | 40    |
| amod         | 2427  | 1272    | 52.4 | 2425  | 99.9 | 1272 | 52.5  | 2    | 0.1  | 0    | 0     |
| punct        | 2046  | 539     | 26.3 | 1621  | 79.2 | 450  | 27.8  | 425  | 20.8 | 89   | 20.9  |
| cc           | 1938  | 797     | 41.1 | 477   | 24.6 | 105  | 22    | 1461 | 75.4 | 692  | 47.4  |
| obj          | 1923  | 667     | 34.7 | 1919  | 99.8 | 667  | 34.8  | 4    | 0.2  | 0    | 0     |
| nsubj        | 1568  | 704     | 44.9 | 1021  | 65.1 | 544  | 53.3  | 547  | 34.9 | 160  | 29.3  |
| obl          | 1389  | 329     | 23.7 | 1300  | 93.6 | 310  | 23.8  | 89   | 6.4  | 19   | 21.3  |
| conj         | 1219  | 273     | 22.4 | 1219  | 100  | 273  | 22.4  | 0    | 0    | 0    | 0     |
| mark         | 764   | 256     | 33.5 | 17    | 2.2  | 0    | 0     | 747  | 97.8 | 256  | 34.3  |
| acl          | 555   | 175     | 31.5 | 551   | 99.3 | 175  | 31.8  | 4    | 0.7  | 0    | 0     |
| parataxis    | 518   | 320     | 61.8 | 517   | 99.8 | 320  | 61.9  | 1    | 0.2  | 0    | 0     |
| nummod       | 378   | 184     | 48.7 | 378   | 100  | 184  | 48.7  | 0    | 0    | 0    | 0     |
| advmod       | 319   | 94      | 29.5 | 144   | 45.1 | 26   | 18.1  | 175  | 54.9 | 68   | 38.9  |
| ccomp        | 318   | 93      | 29.2 | 318   | 100  | 93   | 29.2  | 0    | 0    | 0    | 0     |
| advcl        | 196   | 24      | 12.2 | 165   | 84.2 | 23   | 13.9  | 31   | 15.8 | 1    | 3.2   |
| det          | 195   | 70      | 35.9 | 43    | 22.1 | 1    | 2.3   | 152  | 77.9 | 69   | 45.4  |
| iobj         | 186   | 51      | 27.4 | 183   | 98.4 | 51   | 27.9  | 3    | 1.6  | 0    | 0     |
| xcomp        | 167   | 40      | 24   | 166   | 99.4 | 40   | 24.1  | 1    | 0.6  | 0    | 0     |
| aux          | 143   | 82      | 57.3 | 7     | 4.9  | 0    | 0     | 136  | 95.1 | 82   | 60.3  |
| advmod:emph  | 127   | 14      | 11   | 34    | 26.8 | 4    | 11.8  | 93   | 73.2 | 10   | 10.8  |
| dep          | 101   | 48      | 47.5 | 101   | 100  | 48   | 47.5  | 0    | 0    | 0    | 0     |
| cop          | 96    | 16      | 16.7 | 1     | 1    | 0    | 0     | 95   | 99   | 16   | 16.8  |
| fixed        | 84    | 39      | 46.4 | 84    | 100  | 39   | 46.4  | 0    | 0    | 0    | 0     |
| appos        | 81    | 16      | 19.8 | 68    | 84   | 15   | 22.1  | 13   | 16   | 1    | 7.7   |
| nsubj:pass   | 73    | 38      | 52.1 | 52    | 71.2 | 33   | 63.5  | 21   | 28.8 | 5    | 23.8  |
| csubj        | 39    | 7       | 17.9 | 39    | 100  | 7    | 17.9  | 0    | 0    | 0    | 0     |
| flat:foreign | 29    | 12      | 41.4 | 2     | 6.9  | 0    | 0     | 27   | 93.1 | 12   | 44.4  |
| aux:pass     | 13    | 7       | 53.8 | 0     | 0    | 0    | 0     | 13   | 100  | 7    | 53.8  |
| total        | 27396 | 10514   | 38.4 | 18749 | 68.4 | 7184 | 38.3  | 8647 | 31.6 | 3330 | 38.5  |

Table 1: Arabic. Exact match.

| deprel       | count | found-m | %    | HI    | HI%  | HI-m | HI-m% | HF   | HF%  | HF-m | HF-m% |
|--------------|-------|---------|------|-------|------|------|-------|------|------|------|-------|
| nmod         | 6184  | 3278    | 53   | 5866  | 94.9 | 3133 | 53.4  | 318  | 5.1  | 145  | 45.6  |
| case         | 4320  | 1972    | 45.6 | 31    | 0.7  | 8    | 25.8  | 4289 | 99.3 | 1964 | 45.8  |
| amod         | 2427  | 1422    | 58.6 | 2425  | 99.9 | 1422 | 58.6  | 2    | 0.1  | 0    | 0     |
| punct        | 2046  | 726     | 35.5 | 1621  | 79.2 | 613  | 37.8  | 425  | 20.8 | 113  | 26.6  |
| cc           | 1938  | 943     | 48.7 | 477   | 24.6 | 135  | 28.3  | 1461 | 75.4 | 808  | 55.3  |
| obj          | 1923  | 920     | 47.8 | 1919  | 99.8 | 920  | 47.9  | 4    | 0.2  | 0    | 0     |
| nsubj        | 1568  | 820     | 52.3 | 1021  | 65.1 | 606  | 59.4  | 547  | 34.9 | 214  | 39.1  |
| obl          | 1389  | 494     | 35.6 | 1300  | 93.6 | 472  | 36.3  | 89   | 6.4  | 22   | 24.7  |
| conj         | 1219  | 408     | 33.5 | 1219  | 100  | 408  | 33.5  | 0    | 0    | 0    | 0     |
| mark         | 764   | 330     | 43.2 | 17    | 2.2  | 0    | 0     | 747  | 97.8 | 330  | 44.2  |
| acl          | 555   | 226     | 40.7 | 551   | 99.3 | 226  | 41    | 4    | 0.7  | 0    | 0     |
| parataxis    | 518   | 339     | 65.4 | 517   | 99.8 | 339  | 65.6  | 1    | 0.2  | 0    | 0     |
| nummod       | 378   | 224     | 59.3 | 378   | 100  | 224  | 59.3  | 0    | 0    | 0    | 0     |
| advmod       | 319   | 104     | 32.6 | 144   | 45.1 | 36   | 25    | 175  | 54.9 | 68   | 38.9  |
| ccomp        | 318   | 133     | 41.8 | 318   | 100  | 133  | 41.8  | 0    | 0    | 0    | 0     |
| advcl        | 196   | 46      | 23.5 | 165   | 84.2 | 45   | 27.3  | 31   | 15.8 | 1    | 3.2   |
| det          | 195   | 73      | 37.4 | 43    | 22.1 | 2    | 4.7   | 152  | 77.9 | 71   | 46.7  |
| iobj         | 186   | 73      | 39.2 | 183   | 98.4 | 73   | 39.9  | 3    | 1.6  | 0    | 0     |
| xcomp        | 167   | 55      | 32.9 | 166   | 99.4 | 55   | 33.1  | 1    | 0.6  | 0    | 0     |
| aux          | 143   | 82      | 57.3 | 7     | 4.9  | 0    | 0     | 136  | 95.1 | 82   | 60.3  |
| advmod:emph  | 127   | 18      | 14.2 | 34    | 26.8 | 7    | 20.6  | 93   | 73.2 | 11   | 11.8  |
| dep          | 101   | 51      | 50.5 | 101   | 100  | 51   | 50.5  | 0    | 0    | 0    | 0     |
| cop          | 96    | 22      | 22.9 | 1     | 1    | 0    | 0     | 95   | 99   | 22   | 23.2  |
| fixed        | 84    | 41      | 48.8 | 84    | 100  | 41   | 48.8  | 0    | 0    | 0    | 0     |
| appos        | 81    | 24      | 29.6 | 68    | 84   | 23   | 33.8  | 13   | 16   | 1    | 7.7   |
| nsubj:pass   | 73    | 41      | 56.2 | 52    | 71.2 | 33   | 63.5  | 21   | 28.8 | 8    | 38.1  |
| csubj        | 39    | 15      | 38.5 | 39    | 100  | 15   | 38.5  | 0    | 0    | 0    | 0     |
| flat:foreign | 29    | 13      | 44.8 | 2     | 6.9  | 0    | 0     | 27   | 93.1 | 13   | 48.1  |
| aux:pass     | 13    | 7       | 53.8 | 0     | 0    | 0    | 0     | 13   | 100  | 7    | 53.8  |
| total        | 27396 | 12900   | 47.1 | 18749 | 68.4 | 9020 | 48.1  | 8647 | 31.6 | 3880 | 44.9  |

Table 2: Arabic. Approximate match.

| deprel       | count  | found-m | %    | HI    | HI%  | HI-m  | HI-m% | HF    | HF%  | HF-m  | HF-m% |
|--------------|--------|---------|------|-------|------|-------|-------|-------|------|-------|-------|
| punct        | 24445  | 13324   | 54.5 | 13959 | 57.1 | 7541  | 54    | 10486 | 42.9 | 5783  | 55.1  |
| nmod         | 17279  | 12938   | 74.9 | 15995 | 92.6 | 12228 | 76.4  | 1284  | 7.4  | 710   | 55.3  |
| amod         | 17271  | 14351   | 83.1 | 1251  | 7.2  | 403   | 32.2  | 16020 | 92.8 | 13948 | 87.1  |
| case         | 15839  | 13705   | 86.5 | 6     | 0    | 0     | 0     | 15833 | 100  | 13705 | 86.6  |
| nsubj        | 9820   | 4822    | 49.1 | 3072  | 31.3 | 1306  | 42.5  | 6748  | 68.7 | 3516  | 52.1  |
| obl          | 9728   | 3925    | 40.3 | 5194  | 53.4 | 2242  | 43.2  | 4534  | 46.6 | 1683  | 37.1  |
| obj          | 9139   | 4673    | 51.1 | 6343  | 69.4 | 3704  | 58.4  | 2796  | 30.6 | 969   | 34.7  |
| advmod       | 7117   | 3439    | 48.3 | 1587  | 22.3 | 346   | 21.8  | 5530  | 77.7 | 3093  | 55.9  |
| conj         | 7099   | 3806    | 53.6 | 7099  | 100  | 3806  | 53.6  | 0     | 0    | 0     | 0     |
| cc           | 5854   | 3755    | 64.1 | 190   | 3.2  | 52    | 27.4  | 5664  | 96.8 | 3703  | 65.4  |
| det          | 3328   | 2859    | 85.9 | 81    | 2.4  | 20    | 24.7  | 3247  | 97.6 | 2839  | 87.4  |
| mark         | 3318   | 1835    | 55.3 | 84    | 2.5  | 66    | 78.6  | 3234  | 97.5 | 1769  | 54.7  |
| advmod:emph  | 2544   | 1832    | 72   | 28    | 1.1  | 2     | 7.1   | 2516  | 98.9 | 1830  | 72.7  |
| cop          | 2508   | 1427    | 56.9 | 394   | 15.7 | 201   | 51    | 2114  | 84.3 | 1226  | 58    |
| acl          | 2492   | 1168    | 46.9 | 2470  | 99.1 | 1166  | 47.2  | 22    | 0.9  | 2     | 9.1   |
| xcomp        | 2132   | 1053    | 49.4 | 1971  | 92.4 | 1019  | 51.7  | 161   | 7.6  | 34    | 21.1  |
| nummod       | 2051   | 1125    | 54.9 | 889   | 43.3 | 399   | 44.9  | 1162  | 56.7 | 726   | 62.5  |
| expl:pvt     | 1901   | 1051    | 55.3 | 357   | 18.8 | 232   | 65    | 1544  | 81.2 | 819   | 53    |
| aux          | 1749   | 925     | 52.9 | 219   | 12.5 | 137   | 62.6  | 1530  | 87.5 | 788   | 51.5  |
| dep          | 1515   | 784     | 51.7 | 1368  | 90.3 | 762   | 55.7  | 147   | 9.7  | 22    | 15    |
| flat         | 1468   | 1234    | 84.1 | 1468  | 100  | 1234  | 84.1  | 0     | 0    | 0     | 0     |
| advcl        | 1274   | 365     | 28.6 | 790   | 62   | 240   | 30.4  | 484   | 38   | 125   | 25.8  |
| ccomp        | 1152   | 464     | 40.3 | 940   | 81.6 | 393   | 41.8  | 212   | 18.4 | 71    | 33.5  |
| iobj         | 961    | 406     | 42.2 | 576   | 59.9 | 263   | 45.7  | 385   | 40.1 | 143   | 37.1  |
| nsubj:pass   | 856    | 388     | 45.3 | 347   | 40.5 | 157   | 45.2  | 509   | 59.5 | 231   | 45.4  |
| appos        | 807    | 385     | 47.7 | 805   | 99.8 | 385   | 47.8  | 2     | 0.2  | 0     | 0     |
| nummod:gov   | 767    | 640     | 83.4 | 17    | 2.2  | 2     | 11.8  | 750   | 97.8 | 638   | 85.1  |
| aux:pass     | 668    | 362     | 54.2 | 12    | 1.8  | 0     | 0     | 656   | 98.2 | 362   | 55.2  |
| csbj         | 607    | 276     | 45.5 | 548   | 90.3 | 264   | 48.2  | 59    | 9.7  | 12    | 20.3  |
| expl:pass    | 535    | 289     | 54   | 83    | 15.5 | 44    | 53    | 452   | 84.5 | 245   | 54.2  |
| fixed        | 494    | 460     | 93.1 | 494   | 100  | 460   | 93.1  | 0     | 0    | 0     | 0     |
| flat:foreign | 315    | 127     | 40.3 | 63    | 20   | 19    | 30.2  | 252   | 80   | 108   | 42.9  |
| parataxis    | 216    | 48      | 22.2 | 154   | 71.3 | 35    | 22.7  | 62    | 28.7 | 13    | 21    |
| compound     | 201    | 133     | 66.2 | 153   | 76.1 | 99    | 64.7  | 48    | 23.9 | 34    | 70.8  |
| det:numgov   | 116    | 102     | 87.9 | 4     | 3.4  | 0     | 0     | 112   | 96.6 | 102   | 91.1  |
| det:nummod   | 70     | 50      | 71.4 | 5     | 7.1  | 2     | 40    | 65    | 92.9 | 48    | 73.8  |
| csbj:pass    | 49     | 26      | 53.1 | 45    | 91.8 | 26    | 57.8  | 4     | 8.2  | 0     | 0     |
| discourse    | 45     | 14      | 31.1 | 9     | 20   | 3     | 33.3  | 36    | 80   | 11    | 30.6  |
| vocative     | 10     | 4       | 40   | 4     | 40   | 1     | 25    | 6     | 60   | 3     | 50    |
| total        | 157740 | 98570   | 62.5 | 69074 | 43.8 | 39259 | 56.8  | 88666 | 56.2 | 59311 | 66.9  |

Table 3: Czech. Exact match.

| deprel       | count  | found-m | %    | HI    | HI%  | HI-m  | HI-m% | HF    | HF%  | HF-m  | HF-m% |
|--------------|--------|---------|------|-------|------|-------|-------|-------|------|-------|-------|
| punct        | 24445  | 16909   | 69.2 | 13959 | 57.1 | 9688  | 69.4  | 10486 | 42.9 | 7221  | 68.9  |
| nmod         | 17279  | 14874   | 86.1 | 15995 | 92.6 | 14072 | 88    | 1284  | 7.4  | 802   | 62.5  |
| amod         | 17271  | 15056   | 87.2 | 1251  | 7.2  | 506   | 40.4  | 16020 | 92.8 | 14550 | 90.8  |
| case         | 15839  | 14745   | 93.1 | 6     | 0    | 0     | 0     | 15833 | 100  | 14745 | 93.1  |
| nsubj        | 9820   | 6165    | 62.8 | 3072  | 31.3 | 1596  | 52    | 6748  | 68.7 | 4569  | 67.7  |
| obl          | 9728   | 5226    | 53.7 | 5194  | 53.4 | 2965  | 57.1  | 4534  | 46.6 | 2261  | 49.9  |
| obj          | 9139   | 5810    | 63.6 | 6343  | 69.4 | 4520  | 71.3  | 2796  | 30.6 | 1290  | 46.1  |
| advmod       | 7117   | 4132    | 58.1 | 1587  | 22.3 | 419   | 26.4  | 5530  | 77.7 | 3713  | 67.1  |
| conj         | 7099   | 4826    | 68   | 7099  | 100  | 4826  | 68    | 0     | 0    | 0     | 0     |
| cc           | 5854   | 4467    | 76.3 | 190   | 3.2  | 67    | 35.3  | 5664  | 96.8 | 4400  | 77.7  |
| det          | 3328   | 3009    | 90.4 | 81    | 2.4  | 21    | 25.9  | 3247  | 97.6 | 2988  | 92    |
| mark         | 3318   | 2317    | 69.8 | 84    | 2.5  | 66    | 78.6  | 3234  | 97.5 | 2251  | 69.6  |
| advmod:emph  | 2544   | 2064    | 81.1 | 28    | 1.1  | 4     | 14.3  | 2516  | 98.9 | 2060  | 81.9  |
| cop          | 2508   | 1857    | 74   | 394   | 15.7 | 231   | 58.6  | 2114  | 84.3 | 1626  | 76.9  |
| acl          | 2492   | 1536    | 61.6 | 2470  | 99.1 | 1532  | 62    | 22    | 0.9  | 4     | 18.2  |
| xcomp        | 2132   | 1412    | 66.2 | 1971  | 92.4 | 1368  | 69.4  | 161   | 7.6  | 44    | 27.3  |
| nummod       | 2051   | 1303    | 63.5 | 889   | 43.3 | 461   | 51.9  | 1162  | 56.7 | 842   | 72.5  |
| expl:pvt     | 1901   | 1297    | 68.2 | 357   | 18.8 | 234   | 65.5  | 1544  | 81.2 | 1063  | 68.8  |
| aux          | 1749   | 1216    | 69.5 | 219   | 12.5 | 141   | 64.4  | 1530  | 87.5 | 1075  | 70.3  |
| dep          | 1515   | 999     | 65.9 | 1368  | 90.3 | 962   | 70.3  | 147   | 9.7  | 37    | 25.2  |
| flat         | 1468   | 1339    | 91.2 | 1468  | 100  | 1339  | 91.2  | 0     | 0    | 0     | 0     |
| advcl        | 1274   | 583     | 45.8 | 790   | 62   | 397   | 50.3  | 484   | 38   | 186   | 38.4  |
| ccomp        | 1152   | 633     | 54.9 | 940   | 81.6 | 533   | 56.7  | 212   | 18.4 | 100   | 47.2  |
| iobj         | 961    | 548     | 57   | 576   | 59.9 | 352   | 61.1  | 385   | 40.1 | 196   | 50.9  |
| nsubj:pass   | 856    | 496     | 57.9 | 347   | 40.5 | 188   | 54.2  | 509   | 59.5 | 308   | 60.5  |
| appos        | 807    | 537     | 66.5 | 805   | 99.8 | 537   | 66.7  | 2     | 0.2  | 0     | 0     |
| nummod:gov   | 767    | 684     | 89.2 | 17    | 2.2  | 4     | 23.5  | 750   | 97.8 | 680   | 90.7  |
| aux:pass     | 668    | 475     | 71.1 | 12    | 1.8  | 0     | 0     | 656   | 98.2 | 475   | 72.4  |
| csubj        | 607    | 368     | 60.6 | 548   | 90.3 | 352   | 64.2  | 59    | 9.7  | 16    | 27.1  |
| expl:pass    | 535    | 374     | 69.9 | 83    | 15.5 | 44    | 53    | 452   | 84.5 | 330   | 73    |
| fixed        | 494    | 462     | 93.5 | 494   | 100  | 462   | 93.5  | 0     | 0    | 0     | 0     |
| flat:foreign | 315    | 155     | 49.2 | 63    | 20   | 26    | 41.3  | 252   | 80   | 129   | 51.2  |
| parataxis    | 216    | 82      | 38   | 154   | 71.3 | 64    | 41.6  | 62    | 28.7 | 18    | 29    |
| compound     | 201    | 140     | 69.7 | 153   | 76.1 | 106   | 69.3  | 48    | 23.9 | 34    | 70.8  |
| det:numgov   | 116    | 105     | 90.5 | 4     | 3.4  | 0     | 0     | 112   | 96.6 | 105   | 93.8  |
| det:nummod   | 70     | 54      | 77.1 | 5     | 7.1  | 2     | 40    | 65    | 92.9 | 52    | 80    |
| csubj:pass   | 49     | 29      | 59.2 | 45    | 91.8 | 28    | 62.2  | 4     | 8.2  | 1     | 25    |
| discourse    | 45     | 25      | 55.6 | 9     | 20   | 5     | 55.6  | 36    | 80   | 20    | 55.6  |
| vocative     | 10     | 5       | 50   | 4     | 40   | 2     | 50    | 6     | 60   | 3     | 50    |
| total        | 157740 | 116314  | 73.7 | 69074 | 43.8 | 48120 | 69.7  | 88666 | 56.2 | 68194 | 76.9  |

Table 4: Czech. Approximate match.

| deprel       | count | found-m | %    | HI   | HI%  | HI-m | HI-m% | HF    | HF%  | HF-m | HF-m% |
|--------------|-------|---------|------|------|------|------|-------|-------|------|------|-------|
| punct        | 3031  | 1530    | 50.5 | 2187 | 72.2 | 1205 | 55.1  | 844   | 27.8 | 325  | 38.5  |
| case         | 1961  | 1429    | 72.9 | 78   | 4    | 54   | 69.2  | 1883  | 96   | 1375 | 73    |
| nsubj        | 1951  | 1383    | 70.9 | 87   | 4.5  | 50   | 57.5  | 1864  | 95.5 | 1333 | 71.5  |
| det          | 1817  | 1408    | 77.5 | 4    | 0.2  | 0    | 0     | 1813  | 99.8 | 1408 | 77.7  |
| advmod       | 1262  | 613     | 48.6 | 305  | 24.2 | 108  | 35.4  | 957   | 75.8 | 505  | 52.8  |
| obj          | 1169  | 892     | 76.3 | 1135 | 97.1 | 882  | 77.7  | 34    | 2.9  | 10   | 29.4  |
| amod         | 1162  | 820     | 70.6 | 36   | 3.1  | 10   | 27.8  | 1126  | 96.9 | 810  | 71.9  |
| compound     | 1147  | 720     | 62.8 | 22   | 1.9  | 5    | 22.7  | 1125  | 98.1 | 715  | 63.6  |
| obl          | 1044  | 555     | 53.2 | 963  | 92.2 | 533  | 55.3  | 81    | 7.8  | 22   | 27.2  |
| conj         | 856   | 370     | 43.2 | 846  | 98.8 | 366  | 43.3  | 10    | 1.2  | 4    | 40    |
| aux          | 809   | 560     | 69.2 | 2    | 0.2  | 0    | 0     | 807   | 99.8 | 560  | 69.4  |
| mark         | 769   | 569     | 74   | 0    | 0    | 0    | 0     | 769   | 100  | 569  | 74    |
| nmod         | 764   | 471     | 61.6 | 757  | 99.1 | 471  | 62.2  | 7     | 0.9  | 0    | 0     |
| cc           | 747   | 499     | 66.8 | 0    | 0    | 0    | 0     | 747   | 100  | 499  | 66.8  |
| cop          | 554   | 396     | 71.5 | 36   | 6.5  | 20   | 55.6  | 518   | 93.5 | 376  | 72.6  |
| nmod:poss    | 384   | 313     | 81.5 | 0    | 0    | 0    | 0     | 384   | 100  | 313  | 81.5  |
| advcl        | 367   | 163     | 44.4 | 285  | 77.7 | 133  | 46.7  | 82    | 22.3 | 30   | 36.6  |
| xcomp        | 343   | 248     | 72.3 | 343  | 100  | 248  | 72.3  | 0     | 0    | 0    | 0     |
| nummod       | 277   | 151     | 54.5 | 73   | 26.4 | 34   | 46.6  | 204   | 73.6 | 117  | 57.4  |
| list         | 251   | 41      | 16.3 | 249  | 99.2 | 41   | 16.5  | 2     | 0.8  | 0    | 0     |
| flat         | 247   | 179     | 72.5 | 247  | 100  | 179  | 72.5  | 0     | 0    | 0    | 0     |
| ccomp        | 241   | 115     | 47.7 | 233  | 96.7 | 115  | 49.4  | 8     | 3.3  | 0    | 0     |
| acl:relcl    | 212   | 105     | 49.5 | 212  | 100  | 105  | 49.5  | 0     | 0    | 0    | 0     |
| parataxis    | 199   | 57      | 28.6 | 188  | 94.5 | 55   | 29.3  | 11    | 5.5  | 2    | 18.2  |
| appos        | 186   | 64      | 34.4 | 178  | 95.7 | 62   | 34.8  | 8     | 4.3  | 2    | 25    |
| acl          | 173   | 92      | 53.2 | 172  | 99.4 | 92   | 53.5  | 1     | 0.6  | 0    | 0     |
| discourse    | 122   | 66      | 54.1 | 39   | 32   | 16   | 41    | 83    | 68   | 50   | 60.2  |
| aux:pass     | 114   | 79      | 69.3 | 4    | 3.5  | 1    | 25    | 110   | 96.5 | 78   | 70.9  |
| nsubj:pass   | 100   | 61      | 61   | 4    | 4    | 0    | 0     | 96    | 96   | 61   | 63.5  |
| compound:prt | 87    | 61      | 70.1 | 87   | 100  | 61   | 70.1  | 0     | 0    | 0    | 0     |
| obl:tmod     | 66    | 28      | 42.4 | 60   | 90.9 | 28   | 46.7  | 6     | 9.1  | 0    | 0     |
| expl         | 64    | 39      | 60.9 | 8    | 12.5 | 0    | 0     | 56    | 87.5 | 39   | 69.6  |
| fixed        | 62    | 47      | 75.8 | 62   | 100  | 47   | 75.8  | 0     | 0    | 0    | 0     |
| obl:npmmod   | 48    | 22      | 45.8 | 14   | 29.2 | 4    | 28.6  | 34    | 70.8 | 18   | 52.9  |
| iobj         | 40    | 37      | 92.5 | 40   | 100  | 37   | 92.5  | 0     | 0    | 0    | 0     |
| nmod:tmod    | 37    | 23      | 62.2 | 37   | 100  | 23   | 62.2  | 0     | 0    | 0    | 0     |
| csubj        | 23    | 5       | 21.7 | 16   | 69.6 | 3    | 18.8  | 7     | 30.4 | 2    | 28.6  |
| det:predet   | 22    | 18      | 81.8 | 0    | 0    | 0    | 0     | 22    | 100  | 18   | 81.8  |
| vocative     | 20    | 14      | 70   | 11   | 55   | 10   | 90.9  | 9     | 45   | 4    | 44.4  |
| nmod:npmmod  | 13    | 3       | 23.1 | 9    | 69.2 | 2    | 22.2  | 4     | 30.8 | 1    | 25    |
| cc:preconj   | 9     | 1       | 11.1 | 1    | 11.1 | 0    | 0     | 8     | 88.9 | 1    | 12.5  |
| flat:foreign | 7     | 0       | 0    | 3    | 42.9 | 0    | 0     | 4     | 57.1 | 0    | 0     |
| dep          | 1     | 0       | 0    | 0    | 0    | 0    | 0     | 1     | 100  | 0    | 0     |
| csubj:pass   | 1     | 0       | 0    | 0    | 0    | 0    | 0     | 1     | 100  | 0    | 0     |
| total        | 22759 | 14247   | 62.6 | 9033 | 39.7 | 5000 | 55.4  | 13726 | 60.3 | 9247 | 67.4  |

Table 5: English. Exact match.

| deprel       | count | found-m | %    | HI   | HI%  | HI-m | HI-m% | HF    | HF%  | HF-m  | HF-m% |
|--------------|-------|---------|------|------|------|------|-------|-------|------|-------|-------|
| punct        | 3031  | 1962    | 64.7 | 2187 | 72.2 | 1524 | 69.7  | 844   | 27.8 | 438   | 51.9  |
| case         | 1961  | 1634    | 83.3 | 78   | 4    | 57   | 73.1  | 1883  | 96   | 1577  | 83.7  |
| nsubj        | 1951  | 1667    | 85.4 | 87   | 4.5  | 58   | 66.7  | 1864  | 95.5 | 1609  | 86.3  |
| det          | 1817  | 1537    | 84.6 | 4    | 0.2  | 0    | 0     | 1813  | 99.8 | 1537  | 84.8  |
| advmod       | 1262  | 725     | 57.4 | 305  | 24.2 | 130  | 42.6  | 957   | 75.8 | 595   | 62.2  |
| obj          | 1169  | 986     | 84.3 | 1135 | 97.1 | 975  | 85.9  | 34    | 2.9  | 11    | 32.4  |
| amod         | 1162  | 880     | 75.7 | 36   | 3.1  | 10   | 27.8  | 1126  | 96.9 | 870   | 77.3  |
| compound     | 1147  | 820     | 71.5 | 22   | 1.9  | 5    | 22.7  | 1125  | 98.1 | 815   | 72.4  |
| obl          | 1044  | 698     | 66.9 | 963  | 92.2 | 667  | 69.3  | 81    | 7.8  | 31    | 38.3  |
| conj         | 856   | 504     | 58.9 | 846  | 98.8 | 499  | 59    | 10    | 1.2  | 5     | 50    |
| aux          | 809   | 714     | 88.3 | 2    | 0.2  | 0    | 0     | 807   | 99.8 | 714   | 88.5  |
| mark         | 769   | 623     | 81   | 0    | 0    | 0    | 0     | 769   | 100  | 623   | 81    |
| nmod         | 764   | 583     | 76.3 | 757  | 99.1 | 583  | 77    | 7     | 0.9  | 0     | 0     |
| cc           | 747   | 597     | 79.9 | 0    | 0    | 0    | 0     | 747   | 100  | 597   | 79.9  |
| cop          | 554   | 476     | 85.9 | 36   | 6.5  | 21   | 58.3  | 518   | 93.5 | 455   | 87.8  |
| nmod:poss    | 384   | 336     | 87.5 | 0    | 0    | 0    | 0     | 384   | 100  | 336   | 87.5  |
| advcl        | 367   | 211     | 57.5 | 285  | 77.7 | 170  | 59.6  | 82    | 22.3 | 41    | 50    |
| xcomp        | 343   | 290     | 84.5 | 343  | 100  | 290  | 84.5  | 0     | 0    | 0     | 0     |
| nummod       | 277   | 173     | 62.5 | 73   | 26.4 | 36   | 49.3  | 204   | 73.6 | 137   | 67.2  |
| list         | 251   | 81      | 32.3 | 249  | 99.2 | 81   | 32.5  | 2     | 0.8  | 0     | 0     |
| flat         | 247   | 203     | 82.2 | 247  | 100  | 203  | 82.2  | 0     | 0    | 0     | 0     |
| ccomp        | 241   | 162     | 67.2 | 233  | 96.7 | 161  | 69.1  | 8     | 3.3  | 1     | 12.5  |
| acl:relcl    | 212   | 135     | 63.7 | 212  | 100  | 135  | 63.7  | 0     | 0    | 0     | 0     |
| parataxis    | 199   | 101     | 50.8 | 188  | 94.5 | 98   | 52.1  | 11    | 5.5  | 3     | 27.3  |
| appos        | 186   | 85      | 45.7 | 178  | 95.7 | 83   | 46.6  | 8     | 4.3  | 2     | 25    |
| acl          | 173   | 112     | 64.7 | 172  | 99.4 | 112  | 65.1  | 1     | 0.6  | 0     | 0     |
| discourse    | 122   | 82      | 67.2 | 39   | 32   | 19   | 48.7  | 83    | 68   | 63    | 75.9  |
| aux:pass     | 114   | 95      | 83.3 | 4    | 3.5  | 1    | 25    | 110   | 96.5 | 94    | 85.5  |
| nsubj:pass   | 100   | 79      | 79   | 4    | 4    | 1    | 25    | 96    | 96   | 78    | 81.2  |
| compound:prt | 87    | 65      | 74.7 | 87   | 100  | 65   | 74.7  | 0     | 0    | 0     | 0     |
| obl:tmod     | 66    | 37      | 56.1 | 60   | 90.9 | 36   | 60    | 6     | 9.1  | 1     | 16.7  |
| expl         | 64    | 47      | 73.4 | 8    | 12.5 | 0    | 0     | 56    | 87.5 | 47    | 83.9  |
| fixed        | 62    | 49      | 79   | 62   | 100  | 49   | 79    | 0     | 0    | 0     | 0     |
| obl:npmmod   | 48    | 24      | 50   | 14   | 29.2 | 5    | 35.7  | 34    | 70.8 | 19    | 55.9  |
| iobj         | 40    | 37      | 92.5 | 40   | 100  | 37   | 92.5  | 0     | 0    | 0     | 0     |
| nmod:tmod    | 37    | 31      | 83.8 | 37   | 100  | 31   | 83.8  | 0     | 0    | 0     | 0     |
| csubj        | 23    | 6       | 26.1 | 16   | 69.6 | 4    | 25    | 7     | 30.4 | 2     | 28.6  |
| det:predet   | 22    | 20      | 90.9 | 0    | 0    | 0    | 0     | 22    | 100  | 20    | 90.9  |
| vocative     | 20    | 17      | 85   | 11   | 55   | 11   | 100   | 9     | 45   | 6     | 66.7  |
| nmod:npmmod  | 13    | 4       | 30.8 | 9    | 69.2 | 3    | 33.3  | 4     | 30.8 | 1     | 25    |
| cc:preconj   | 9     | 2       | 22.2 | 1    | 11.1 | 0    | 0     | 8     | 88.9 | 2     | 25    |
| flat:foreign | 7     | 0       | 0    | 3    | 42.9 | 0    | 0     | 4     | 57.1 | 0     | 0     |
| dep          | 1     | 0       | 0    | 0    | 0    | 0    | 0     | 1     | 100  | 0     | 0     |
| csubj:pass   | 1     | 0       | 0    | 0    | 0    | 0    | 0     | 1     | 100  | 0     | 0     |
| total        | 22759 | 16890   | 74.2 | 9033 | 39.7 | 6160 | 68.2  | 13726 | 60.3 | 10730 | 78.2  |

Table 6: English. Approximate match.

| deprel     | count | found-m | %    | HI    | HI%  | HI-m  | HI-m% | HF    | HF%  | HF-m  | HF-m% |
|------------|-------|---------|------|-------|------|-------|-------|-------|------|-------|-------|
| case       | 7228  | 5091    | 70.4 | 118   | 1.6  | 36    | 30.5  | 7110  | 98.4 | 5055  | 71.1  |
| det        | 7135  | 5183    | 72.6 | 103   | 1.4  | 53    | 51.5  | 7032  | 98.6 | 5130  | 73    |
| punct      | 6306  | 2560    | 40.6 | 3594  | 57   | 1512  | 42.1  | 2712  | 43   | 1048  | 38.6  |
| nmod       | 3586  | 2014    | 56.2 | 3495  | 97.5 | 1990  | 56.9  | 91    | 2.5  | 24    | 26.4  |
| obj        | 3522  | 1914    | 54.3 | 2631  | 74.7 | 1371  | 52.1  | 891   | 25.3 | 543   | 60.9  |
| nsubj      | 2875  | 1591    | 55.3 | 481   | 16.7 | 188   | 39.1  | 2394  | 83.3 | 1403  | 58.6  |
| amod       | 2821  | 1222    | 43.3 | 2005  | 71.1 | 1049  | 52.3  | 816   | 28.9 | 173   | 21.2  |
| obl        | 2434  | 983     | 40.4 | 1781  | 73.2 | 749   | 42.1  | 653   | 26.8 | 234   | 35.8  |
| advmod     | 1913  | 734     | 38.4 | 695   | 36.3 | 246   | 35.4  | 1218  | 63.7 | 488   | 40.1  |
| mark       | 1865  | 866     | 46.4 | 9     | 0.5  | 1     | 11.1  | 1856  | 99.5 | 865   | 46.6  |
| conj       | 1543  | 550     | 35.6 | 1543  | 100  | 550   | 35.6  | 0     | 0    | 0     | 0     |
| cc         | 1440  | 817     | 56.7 | 21    | 1.5  | 1     | 4.8   | 1419  | 98.5 | 816   | 57.5  |
| flat       | 1433  | 1010    | 70.5 | 1433  | 100  | 1010  | 70.5  | 0     | 0    | 0     | 0     |
| acl        | 977   | 385     | 39.4 | 977   | 100  | 385   | 39.4  | 0     | 0    | 0     | 0     |
| aux        | 954   | 620     | 65   | 16    | 1.7  | 1     | 6.2   | 938   | 98.3 | 619   | 66    |
| advcl      | 797   | 183     | 23   | 684   | 85.8 | 164   | 24    | 113   | 14.2 | 19    | 16.8  |
| appos      | 727   | 315     | 43.3 | 721   | 99.2 | 315   | 43.7  | 6     | 0.8  | 0     | 0     |
| fixed      | 708   | 575     | 81.2 | 708   | 100  | 575   | 81.2  | 0     | 0    | 0     | 0     |
| ccomp      | 585   | 203     | 34.7 | 476   | 81.4 | 177   | 37.2  | 109   | 18.6 | 26    | 23.9  |
| nummod     | 578   | 360     | 62.3 | 153   | 26.5 | 51    | 33.3  | 425   | 73.5 | 309   | 72.7  |
| cop        | 533   | 303     | 56.8 | 16    | 3    | 1     | 6.2   | 517   | 97   | 302   | 58.4  |
| xcomp      | 256   | 131     | 51.2 | 246   | 96.1 | 128   | 52    | 10    | 3.9  | 3     | 30    |
| compound   | 234   | 142     | 60.7 | 234   | 100  | 142   | 60.7  | 0     | 0    | 0     | 0     |
| iobj       | 164   | 91      | 55.5 | 79    | 48.2 | 42    | 53.2  | 85    | 51.8 | 49    | 57.6  |
| csbj       | 98    | 29      | 29.6 | 70    | 71.4 | 23    | 32.9  | 28    | 28.6 | 6     | 21.4  |
| parataxis  | 80    | 22      | 27.5 | 41    | 51.2 | 10    | 24.4  | 39    | 48.8 | 12    | 30.8  |
| expl:pass  | 47    | 31      | 66   | 0     | 0    | 0     | 0     | 47    | 100  | 31    | 66    |
| dep        | 24    | 6       | 25   | 15    | 62.5 | 4     | 26.7  | 9     | 37.5 | 2     | 22.2  |
| nsubj:pass | 5     | 1       | 20   | 3     | 60   | 0     | 0     | 2     | 40   | 1     | 50    |
| total      | 50868 | 27932   | 54.9 | 22348 | 43.9 | 10774 | 48.2  | 28520 | 56.1 | 17158 | 60.2  |

Table 7: Spanish. Exact match.



| deprel     | count | found-m | %    | HI    | HI%  | HI-m  | HI-m% | HF    | HF%  | HF-m  | HF-m% |
|------------|-------|---------|------|-------|------|-------|-------|-------|------|-------|-------|
| case       | 7228  | 5972    | 82.6 | 118   | 1.6  | 55    | 46.6  | 7110  | 98.4 | 5917  | 83.2  |
| det        | 7135  | 5895    | 82.6 | 103   | 1.4  | 62    | 60.2  | 7032  | 98.6 | 5833  | 82.9  |
| punct      | 6306  | 3586    | 56.9 | 3594  | 57   | 2158  | 60    | 2712  | 43   | 1428  | 52.7  |
| nmod       | 3586  | 2688    | 75   | 3495  | 97.5 | 2658  | 76.1  | 91    | 2.5  | 30    | 33    |
| obj        | 3522  | 2467    | 70   | 2631  | 74.7 | 1865  | 70.9  | 891   | 25.3 | 602   | 67.6  |
| nsubj      | 2875  | 2046    | 71.2 | 481   | 16.7 | 240   | 49.9  | 2394  | 83.3 | 1806  | 75.4  |
| amod       | 2821  | 1381    | 49   | 2005  | 71.1 | 1194  | 59.6  | 816   | 28.9 | 187   | 22.9  |
| obl        | 2434  | 1382    | 56.8 | 1781  | 73.2 | 1049  | 58.9  | 653   | 26.8 | 333   | 51    |
| advmod     | 1913  | 928     | 48.5 | 695   | 36.3 | 292   | 42    | 1218  | 63.7 | 636   | 52.2  |
| mark       | 1865  | 1143    | 61.3 | 9     | 0.5  | 4     | 44.4  | 1856  | 99.5 | 1139  | 61.4  |
| conj       | 1543  | 810     | 52.5 | 1543  | 100  | 810   | 52.5  | 0     | 0    | 0     | 0     |
| cc         | 1440  | 1022    | 71   | 21    | 1.5  | 4     | 19    | 1419  | 98.5 | 1018  | 71.7  |
| flat       | 1433  | 1135    | 79.2 | 1433  | 100  | 1135  | 79.2  | 0     | 0    | 0     | 0     |
| acl        | 977   | 569     | 58.2 | 977   | 100  | 569   | 58.2  | 0     | 0    | 0     | 0     |
| aux        | 954   | 701     | 73.5 | 16    | 1.7  | 5     | 31.2  | 938   | 98.3 | 696   | 74.2  |
| advcl      | 797   | 302     | 37.9 | 684   | 85.8 | 269   | 39.3  | 113   | 14.2 | 33    | 29.2  |
| appos      | 727   | 428     | 58.9 | 721   | 99.2 | 428   | 59.4  | 6     | 0.8  | 0     | 0     |
| fixed      | 708   | 579     | 81.8 | 708   | 100  | 579   | 81.8  | 0     | 0    | 0     | 0     |
| ccomp      | 585   | 307     | 52.5 | 476   | 81.4 | 261   | 54.8  | 109   | 18.6 | 46    | 42.2  |
| nummod     | 578   | 383     | 66.3 | 153   | 26.5 | 67    | 43.8  | 425   | 73.5 | 316   | 74.4  |
| cop        | 533   | 402     | 75.4 | 16    | 3    | 1     | 6.2   | 517   | 97   | 401   | 77.6  |
| xcomp      | 256   | 174     | 68   | 246   | 96.1 | 171   | 69.5  | 10    | 3.9  | 3     | 30    |
| compound   | 234   | 159     | 67.9 | 234   | 100  | 159   | 67.9  | 0     | 0    | 0     | 0     |
| iobj       | 164   | 103     | 62.8 | 79    | 48.2 | 50    | 63.3  | 85    | 51.8 | 53    | 62.4  |
| csbj       | 98    | 42      | 42.9 | 70    | 71.4 | 31    | 44.3  | 28    | 28.6 | 11    | 39.3  |
| parataxis  | 80    | 34      | 42.5 | 41    | 51.2 | 16    | 39    | 39    | 48.8 | 18    | 46.2  |
| expl:pass  | 47    | 36      | 76.6 | 0     | 0    | 0     | 0     | 47    | 100  | 36    | 76.6  |
| dep        | 24    | 10      | 41.7 | 15    | 62.5 | 8     | 53.3  | 9     | 37.5 | 2     | 22.2  |
| nsubj:pass | 5     | 2       | 40   | 3     | 60   | 1     | 33.3  | 2     | 40   | 1     | 50    |
| total      | 50868 | 34686   | 68.2 | 22348 | 43.9 | 14141 | 63.3  | 28520 | 56.1 | 20545 | 72    |

Table 8: Spanish. Approximate match.

| deprel       | count | found-m | %    | HI   | HI%  | HI-m | HI-m% | HF    | HF%  | HF-m | HF-m% |
|--------------|-------|---------|------|------|------|------|-------|-------|------|------|-------|
| punct        | 3015  | 1422    | 47.2 | 1776 | 58.9 | 811  | 45.7  | 1239  | 41.1 | 611  | 49.3  |
| obl          | 1759  | 671     | 38.1 | 1036 | 58.9 | 404  | 39    | 723   | 41.1 | 267  | 36.9  |
| advmod       | 1514  | 607     | 40.1 | 424  | 28   | 121  | 28.5  | 1090  | 72   | 486  | 44.6  |
| nsubj        | 1196  | 771     | 64.5 | 137  | 11.5 | 20   | 14.6  | 1059  | 88.5 | 751  | 70.9  |
| obj          | 1179  | 546     | 46.3 | 841  | 71.3 | 421  | 50.1  | 338   | 28.7 | 125  | 37    |
| conj         | 1134  | 437     | 38.5 | 1134 | 100  | 437  | 38.5  | 0     | 0    | 0    | 0     |
| nmod:poss    | 1028  | 674     | 65.6 | 0    | 0    | 0    | 0     | 1028  | 100  | 674  | 65.6  |
| amod         | 933   | 656     | 70.3 | 1    | 0.1  | 1    | 100   | 932   | 99.9 | 655  | 70.3  |
| cc           | 910   | 543     | 59.7 | 1    | 0.1  | 0    | 0     | 909   | 99.9 | 543  | 59.7  |
| cop          | 580   | 344     | 59.3 | 106  | 18.3 | 50   | 47.2  | 474   | 81.7 | 294  | 62    |
| aux          | 559   | 353     | 63.1 | 19   | 3.4  | 8    | 42.1  | 540   | 96.6 | 345  | 63.9  |
| nsubj:cop    | 523   | 262     | 50.1 | 132  | 25.2 | 52   | 39.4  | 391   | 74.8 | 210  | 53.7  |
| nmod         | 500   | 181     | 36.2 | 356  | 71.2 | 159  | 44.7  | 144   | 28.8 | 22   | 15.3  |
| mark         | 428   | 214     | 50   | 0    | 0    | 0    | 0     | 428   | 100  | 214  | 50    |
| acl          | 359   | 180     | 50.1 | 50   | 13.9 | 9    | 18    | 309   | 86.1 | 171  | 55.3  |
| advcl        | 353   | 95      | 26.9 | 252  | 71.4 | 82   | 32.5  | 101   | 28.6 | 13   | 12.9  |
| nummod       | 339   | 165     | 48.7 | 89   | 26.3 | 38   | 42.7  | 250   | 73.7 | 127  | 50.8  |
| det          | 307   | 219     | 71.3 | 4    | 1.3  | 0    | 0     | 303   | 98.7 | 219  | 72.3  |
| flat:name    | 287   | 216     | 75.3 | 287  | 100  | 216  | 75.3  | 0     | 0    | 0    | 0     |
| case         | 267   | 174     | 65.2 | 239  | 89.5 | 171  | 71.5  | 28    | 10.5 | 3    | 10.7  |
| xcomp        | 234   | 143     | 61.1 | 220  | 94   | 136  | 61.8  | 14    | 6    | 7    | 50    |
| ccomp        | 228   | 78      | 34.2 | 227  | 99.6 | 78   | 34.4  | 1     | 0.4  | 0    | 0     |
| acl:relcl    | 208   | 72      | 34.6 | 208  | 100  | 72   | 34.6  | 0     | 0    | 0    | 0     |
| nmod:gobj    | 204   | 126     | 61.8 | 0    | 0    | 0    | 0     | 204   | 100  | 126  | 61.8  |
| xcomp:ds     | 120   | 64      | 53.3 | 111  | 92.5 | 61   | 55    | 9     | 7.5  | 3    | 33.3  |
| flat         | 118   | 79      | 66.9 | 118  | 100  | 79   | 66.9  | 0     | 0    | 0    | 0     |
| appos        | 100   | 34      | 34   | 100  | 100  | 34   | 34    | 0     | 0    | 0    | 0     |
| compound:nn  | 93    | 62      | 66.7 | 2    | 2.2  | 2    | 100   | 91    | 97.8 | 60   | 65.9  |
| aux:pass     | 93    | 63      | 67.7 | 1    | 1.1  | 0    | 0     | 92    | 98.9 | 63   | 68.5  |
| parataxis    | 77    | 18      | 23.4 | 76   | 98.7 | 18   | 23.7  | 1     | 1.3  | 0    | 0     |
| fixed        | 58    | 36      | 62.1 | 58   | 100  | 36   | 62.1  | 0     | 0    | 0    | 0     |
| nmod:gsubj   | 54    | 25      | 46.3 | 0    | 0    | 0    | 0     | 54    | 100  | 25   | 46.3  |
| cop:own      | 36    | 25      | 69.4 | 33   | 91.7 | 25   | 75.8  | 3     | 8.3  | 0    | 0     |
| compound:prt | 30    | 16      | 53.3 | 16   | 53.3 | 11   | 68.8  | 14    | 46.7 | 5    | 35.7  |
| csubj:cop    | 22    | 10      | 45.5 | 21   | 95.5 | 10   | 47.6  | 1     | 4.5  | 0    | 0     |
| discourse    | 19    | 6       | 31.6 | 6    | 31.6 | 0    | 0     | 13    | 68.4 | 6    | 46.2  |
| cc:preconj   | 17    | 6       | 35.3 | 0    | 0    | 0    | 0     | 17    | 100  | 6    | 35.3  |
| compound     | 11    | 6       | 54.5 | 0    | 0    | 0    | 0     | 11    | 100  | 6    | 54.5  |
| vocative     | 10    | 3       | 30   | 3    | 30   | 1    | 33.3  | 7     | 70   | 2    | 28.6  |
| csubj        | 2     | 0       | 0    | 1    | 50   | 0    | 0     | 1     | 50   | 0    | 0     |
| dep          | 1     | 0       | 0    | 0    | 0    | 0    | 0     | 1     | 100  | 0    | 0     |
| total        | 18905 | 9602    | 50.8 | 8085 | 42.8 | 3563 | 44.1  | 10820 | 57.2 | 6039 | 55.8  |

Table 9: Finnish. Exact match.

| deprel       | count | found-m | %    | HI   | HI%  | HI-m | HI-m% | HF    | HF%  | HF-m | HF-m% |
|--------------|-------|---------|------|------|------|------|-------|-------|------|------|-------|
| punct        | 3015  | 1981    | 65.7 | 1776 | 58.9 | 1178 | 66.3  | 1239  | 41.1 | 803  | 64.8  |
| obl          | 1759  | 951     | 54.1 | 1036 | 58.9 | 603  | 58.2  | 723   | 41.1 | 348  | 48.1  |
| advmod       | 1514  | 797     | 52.6 | 424  | 28   | 170  | 40.1  | 1090  | 72   | 627  | 57.5  |
| nsubj        | 1196  | 893     | 74.7 | 137  | 11.5 | 28   | 20.4  | 1059  | 88.5 | 865  | 81.7  |
| obj          | 1179  | 712     | 60.4 | 841  | 71.3 | 555  | 66    | 338   | 28.7 | 157  | 46.4  |
| conj         | 1134  | 642     | 56.6 | 1134 | 100  | 642  | 56.6  | 0     | 0    | 0    | 0     |
| nmod:poss    | 1028  | 764     | 74.3 | 0    | 0    | 0    | 0     | 1028  | 100  | 764  | 74.3  |
| amod         | 933   | 713     | 76.4 | 1    | 0.1  | 1    | 100   | 932   | 99.9 | 712  | 76.4  |
| cc           | 910   | 682     | 74.9 | 1    | 0.1  | 0    | 0     | 909   | 99.9 | 682  | 75    |
| cop          | 580   | 436     | 75.2 | 106  | 18.3 | 57   | 53.8  | 474   | 81.7 | 379  | 80    |
| aux          | 559   | 459     | 82.1 | 19   | 3.4  | 9    | 47.4  | 540   | 96.6 | 450  | 83.3  |
| nsubj:cop    | 523   | 354     | 67.7 | 132  | 25.2 | 66   | 50    | 391   | 74.8 | 288  | 73.7  |
| nmod         | 500   | 241     | 48.2 | 356  | 71.2 | 213  | 59.8  | 144   | 28.8 | 28   | 19.4  |
| mark         | 428   | 292     | 68.2 | 0    | 0    | 0    | 0     | 428   | 100  | 292  | 68.2  |
| acl          | 359   | 218     | 60.7 | 50   | 13.9 | 11   | 22    | 309   | 86.1 | 207  | 67    |
| advcl        | 353   | 166     | 47   | 252  | 71.4 | 140  | 55.6  | 101   | 28.6 | 26   | 25.7  |
| nummod       | 339   | 190     | 56   | 89   | 26.3 | 39   | 43.8  | 250   | 73.7 | 151  | 60.4  |
| det          | 307   | 249     | 81.1 | 4    | 1.3  | 1    | 25    | 303   | 98.7 | 248  | 81.8  |
| flat:name    | 287   | 227     | 79.1 | 287  | 100  | 227  | 79.1  | 0     | 0    | 0    | 0     |
| case         | 267   | 186     | 69.7 | 239  | 89.5 | 181  | 75.7  | 28    | 10.5 | 5    | 17.9  |
| xcomp        | 234   | 182     | 77.8 | 220  | 94   | 175  | 79.5  | 14    | 6    | 7    | 50    |
| ccomp        | 228   | 126     | 55.3 | 227  | 99.6 | 125  | 55.1  | 1     | 0.4  | 1    | 100   |
| acl:relcl    | 208   | 114     | 54.8 | 208  | 100  | 114  | 54.8  | 0     | 0    | 0    | 0     |
| nmod:gobj    | 204   | 144     | 70.6 | 0    | 0    | 0    | 0     | 204   | 100  | 144  | 70.6  |
| xcomp:ds     | 120   | 80      | 66.7 | 111  | 92.5 | 77   | 69.4  | 9     | 7.5  | 3    | 33.3  |
| flat         | 118   | 81      | 68.6 | 118  | 100  | 81   | 68.6  | 0     | 0    | 0    | 0     |
| appos        | 100   | 49      | 49   | 100  | 100  | 49   | 49    | 0     | 0    | 0    | 0     |
| compound:nn  | 93    | 69      | 74.2 | 2    | 2.2  | 2    | 100   | 91    | 97.8 | 67   | 73.6  |
| aux:pass     | 93    | 74      | 79.6 | 1    | 1.1  | 0    | 0     | 92    | 98.9 | 74   | 80.4  |
| parataxis    | 77    | 40      | 51.9 | 76   | 98.7 | 40   | 52.6  | 1     | 1.3  | 0    | 0     |
| fixed        | 58    | 37      | 63.8 | 58   | 100  | 37   | 63.8  | 0     | 0    | 0    | 0     |
| nmod:gsubj   | 54    | 29      | 53.7 | 0    | 0    | 0    | 0     | 54    | 100  | 29   | 53.7  |
| cop:own      | 36    | 26      | 72.2 | 33   | 91.7 | 26   | 78.8  | 3     | 8.3  | 0    | 0     |
| compound:prt | 30    | 18      | 60   | 16   | 53.3 | 13   | 81.2  | 14    | 46.7 | 5    | 35.7  |
| csubj:cop    | 22    | 17      | 77.3 | 21   | 95.5 | 17   | 81    | 1     | 4.5  | 0    | 0     |
| discourse    | 19    | 10      | 52.6 | 6    | 31.6 | 1    | 16.7  | 13    | 68.4 | 9    | 69.2  |
| cc:preconj   | 17    | 8       | 47.1 | 0    | 0    | 0    | 0     | 17    | 100  | 8    | 47.1  |
| compound     | 11    | 6       | 54.5 | 0    | 0    | 0    | 0     | 11    | 100  | 6    | 54.5  |
| vocative     | 10    | 4       | 40   | 3    | 30   | 1    | 33.3  | 7     | 70   | 3    | 42.9  |
| csubj        | 2     | 0       | 0    | 1    | 50   | 0    | 0     | 1     | 50   | 0    | 0     |
| dep          | 1     | 0       | 0    | 0    | 0    | 0    | 0     | 1     | 100  | 0    | 0     |
| total        | 18905 | 12267   | 64.9 | 8085 | 42.8 | 4879 | 60.3  | 10820 | 57.2 | 7388 | 68.3  |

Table 10: Finnish. Approximate match.

| deprel     | count | found-m | %    | HI   | HI%  | HI-m | HI-m% | HF   | HF%  | HF-m | HF-m% |
|------------|-------|---------|------|------|------|------|-------|------|------|------|-------|
| det        | 1356  | 1025    | 75.6 | 0    | 0    | 0    | 0     | 1356 | 100  | 1025 | 75.6  |
| case       | 1282  | 960     | 74.9 | 0    | 0    | 0    | 0     | 1282 | 100  | 960  | 74.9  |
| punct      | 1195  | 464     | 38.8 | 808  | 67.6 | 305  | 37.7  | 387  | 32.4 | 159  | 41.1  |
| nmod       | 770   | 428     | 55.6 | 754  | 97.9 | 424  | 56.2  | 16   | 2.1  | 4    | 25    |
| nsubj      | 573   | 343     | 59.9 | 26   | 4.5  | 2    | 7.7   | 547  | 95.5 | 341  | 62.3  |
| obl        | 563   | 254     | 45.1 | 474  | 84.2 | 218  | 46    | 89   | 15.8 | 36   | 40.4  |
| amod       | 480   | 221     | 46   | 365  | 76   | 202  | 55.3  | 115  | 24   | 19   | 16.5  |
| advmod     | 458   | 202     | 44.1 | 125  | 27.3 | 58   | 46.4  | 333  | 72.7 | 144  | 43.2  |
| obj        | 388   | 232     | 59.8 | 309  | 79.6 | 183  | 59.2  | 79   | 20.4 | 49   | 62    |
| conj       | 331   | 123     | 37.2 | 331  | 100  | 123  | 37.2  | 0    | 0    | 0    | 0     |
| cc         | 258   | 159     | 61.6 | 0    | 0    | 0    | 0     | 258  | 100  | 159  | 61.6  |
| mark       | 231   | 152     | 65.8 | 2    | 0.9  | 0    | 0     | 229  | 99.1 | 152  | 66.4  |
| aux        | 187   | 127     | 67.9 | 0    | 0    | 0    | 0     | 187  | 100  | 127  | 67.9  |
| fixed      | 178   | 132     | 74.2 | 178  | 100  | 132  | 74.2  | 0    | 0    | 0    | 0     |
| acl        | 170   | 87      | 51.2 | 160  | 94.1 | 86   | 53.8  | 10   | 5.9  | 1    | 10    |
| nummod     | 146   | 91      | 62.3 | 18   | 12.3 | 2    | 11.1  | 128  | 87.7 | 89   | 69.5  |
| cop        | 132   | 81      | 61.4 | 3    | 2.3  | 0    | 0     | 129  | 97.7 | 81   | 62.8  |
| flat:name  | 119   | 92      | 77.3 | 119  | 100  | 92   | 77.3  | 0    | 0    | 0    | 0     |
| appos      | 118   | 51      | 43.2 | 115  | 97.5 | 49   | 42.6  | 3    | 2.5  | 2    | 66.7  |
| nmod:poss  | 113   | 89      | 78.8 | 0    | 0    | 0    | 0     | 113  | 100  | 89   | 78.8  |
| advcl      | 94    | 27      | 28.7 | 62   | 66   | 18   | 29    | 32   | 34   | 9    | 28.1  |
| acl:relcl  | 75    | 21      | 28   | 75   | 100  | 21   | 28    | 0    | 0    | 0    | 0     |
| ccomp      | 60    | 18      | 30   | 51   | 85   | 17   | 33.3  | 9    | 15   | 1    | 11.1  |
| expl       | 56    | 27      | 48.2 | 10   | 17.9 | 4    | 40    | 46   | 82.1 | 23   | 50    |
| nsubj:pass | 54    | 33      | 61.1 | 0    | 0    | 0    | 0     | 54   | 100  | 33   | 61.1  |
| aux:pass   | 50    | 38      | 76   | 0    | 0    | 0    | 0     | 50   | 100  | 38   | 76    |
| xcomp      | 45    | 25      | 55.6 | 42   | 93.3 | 25   | 59.5  | 3    | 6.7  | 0    | 0     |
| compound   | 44    | 14      | 31.8 | 34   | 77.3 | 12   | 35.3  | 10   | 22.7 | 2    | 20    |
| parataxis  | 32    | 7       | 21.9 | 26   | 81.2 | 7    | 26.9  | 6    | 18.8 | 0    | 0     |
| iobj       | 27    | 10      | 37   | 0    | 0    | 0    | 0     | 27   | 100  | 10   | 37    |
| dep        | 13    | 3       | 23.1 | 11   | 84.6 | 3    | 27.3  | 2    | 15.4 | 0    | 0     |
| discourse  | 5     | 2       | 40   | 1    | 20   | 0    | 0     | 4    | 80   | 2    | 50    |
| csbj       | 1     | 0       | 0    | 0    | 0    | 0    | 0     | 1    | 100  | 0    | 0     |
| total      | 9604  | 5538    | 57.7 | 4099 | 42.7 | 1983 | 48.4  | 5505 | 57.3 | 3555 | 64.6  |

Table 11: French. Exact match.

| deprel     | count | found-m | %    | HI   | HI%  | HI-m | HI-m% | HF   | HF%  | HF-m | HF-m% |
|------------|-------|---------|------|------|------|------|-------|------|------|------|-------|
| det        | 1356  | 1159    | 85.5 | 0    | 0    | 0    | 0     | 1356 | 100  | 1159 | 85.5  |
| case       | 1282  | 1123    | 87.6 | 0    | 0    | 0    | 0     | 1282 | 100  | 1123 | 87.6  |
| punct      | 1195  | 653     | 54.6 | 808  | 67.6 | 448  | 55.4  | 387  | 32.4 | 205  | 53    |
| nmod       | 770   | 590     | 76.6 | 754  | 97.9 | 586  | 77.7  | 16   | 2.1  | 4    | 25    |
| nsubj      | 573   | 445     | 77.7 | 26   | 4.5  | 4    | 15.4  | 547  | 95.5 | 441  | 80.6  |
| obl        | 563   | 344     | 61.1 | 474  | 84.2 | 300  | 63.3  | 89   | 15.8 | 44   | 49.4  |
| amod       | 480   | 244     | 50.8 | 365  | 76   | 223  | 61.1  | 115  | 24   | 21   | 18.3  |
| advmod     | 458   | 256     | 55.9 | 125  | 27.3 | 70   | 56    | 333  | 72.7 | 186  | 55.9  |
| obj        | 388   | 289     | 74.5 | 309  | 79.6 | 225  | 72.8  | 79   | 20.4 | 64   | 81    |
| conj       | 331   | 182     | 55   | 331  | 100  | 182  | 55    | 0    | 0    | 0    | 0     |
| cc         | 258   | 195     | 75.6 | 0    | 0    | 0    | 0     | 258  | 100  | 195  | 75.6  |
| mark       | 231   | 176     | 76.2 | 2    | 0.9  | 0    | 0     | 229  | 99.1 | 176  | 76.9  |
| aux        | 187   | 152     | 81.3 | 0    | 0    | 0    | 0     | 187  | 100  | 152  | 81.3  |
| fixed      | 178   | 143     | 80.3 | 178  | 100  | 143  | 80.3  | 0    | 0    | 0    | 0     |
| acl        | 170   | 116     | 68.2 | 160  | 94.1 | 113  | 70.6  | 10   | 5.9  | 3    | 30    |
| nummod     | 146   | 92      | 63   | 18   | 12.3 | 2    | 11.1  | 128  | 87.7 | 90   | 70.3  |
| cop        | 132   | 101     | 76.5 | 3    | 2.3  | 0    | 0     | 129  | 97.7 | 101  | 78.3  |
| flat:name  | 119   | 94      | 79   | 119  | 100  | 94   | 79    | 0    | 0    | 0    | 0     |
| appos      | 118   | 72      | 61   | 115  | 97.5 | 70   | 60.9  | 3    | 2.5  | 2    | 66.7  |
| nmod:poss  | 113   | 100     | 88.5 | 0    | 0    | 0    | 0     | 113  | 100  | 100  | 88.5  |
| advcl      | 94    | 50      | 53.2 | 62   | 66   | 33   | 53.2  | 32   | 34   | 17   | 53.1  |
| acl:relcl  | 75    | 41      | 54.7 | 75   | 100  | 41   | 54.7  | 0    | 0    | 0    | 0     |
| ccomp      | 60    | 26      | 43.3 | 51   | 85   | 24   | 47.1  | 9    | 15   | 2    | 22.2  |
| expl       | 56    | 36      | 64.3 | 10   | 17.9 | 4    | 40    | 46   | 82.1 | 32   | 69.6  |
| nsubj:pass | 54    | 40      | 74.1 | 0    | 0    | 0    | 0     | 54   | 100  | 40   | 74.1  |
| aux:pass   | 50    | 45      | 90   | 0    | 0    | 0    | 0     | 50   | 100  | 45   | 90    |
| xcomp      | 45    | 35      | 77.8 | 42   | 93.3 | 35   | 83.3  | 3    | 6.7  | 0    | 0     |
| compound   | 44    | 16      | 36.4 | 34   | 77.3 | 14   | 41.2  | 10   | 22.7 | 2    | 20    |
| parataxis  | 32    | 13      | 40.6 | 26   | 81.2 | 12   | 46.2  | 6    | 18.8 | 1    | 16.7  |
| iobj       | 27    | 13      | 48.1 | 0    | 0    | 0    | 0     | 27   | 100  | 13   | 48.1  |
| dep        | 13    | 4       | 30.8 | 11   | 84.6 | 3    | 27.3  | 2    | 15.4 | 1    | 50    |
| discourse  | 5     | 2       | 40   | 1    | 20   | 0    | 0     | 4    | 80   | 2    | 50    |
| csubj      | 1     | 0       | 0    | 0    | 0    | 0    | 0     | 1    | 100  | 0    | 0     |
| total      | 9604  | 6847    | 71.3 | 4099 | 42.7 | 2626 | 64.1  | 5505 | 57.3 | 4221 | 76.7  |

Table 12: French. Approximate match.

| deprel       | count | found-m | %    | HI   | HI%  | HI-m | HI-m% | HF   | HF%  | HF-m | HF-m% |
|--------------|-------|---------|------|------|------|------|-------|------|------|------|-------|
| det          | 1623  | 1192    | 73.4 | 0    | 0    | 0    | 0     | 1623 | 100  | 1192 | 73.4  |
| case         | 1535  | 1008    | 65.7 | 0    | 0    | 0    | 0     | 1535 | 100  | 1008 | 65.7  |
| punct        | 1170  | 532     | 45.5 | 952  | 81.4 | 446  | 46.8  | 218  | 18.6 | 86   | 39.4  |
| nmod         | 843   | 435     | 51.6 | 823  | 97.6 | 432  | 52.5  | 20   | 2.4  | 3    | 15    |
| obl          | 652   | 264     | 40.5 | 502  | 77   | 207  | 41.2  | 150  | 23   | 57   | 38    |
| amod         | 570   | 227     | 39.8 | 383  | 67.2 | 190  | 49.6  | 187  | 32.8 | 37   | 19.8  |
| nsubj        | 429   | 252     | 58.7 | 111  | 25.9 | 69   | 62.2  | 318  | 74.1 | 183  | 57.5  |
| advmod       | 365   | 139     | 38.1 | 70   | 19.2 | 15   | 21.4  | 295  | 80.8 | 124  | 42    |
| obj          | 336   | 194     | 57.7 | 295  | 87.8 | 171  | 58    | 41   | 12.2 | 23   | 56.1  |
| conj         | 304   | 103     | 33.9 | 304  | 100  | 103  | 33.9  | 0    | 0    | 0    | 0     |
| cc           | 262   | 143     | 54.6 | 4    | 1.5  | 0    | 0     | 258  | 98.5 | 143  | 55.4  |
| aux          | 192   | 154     | 80.2 | 0    | 0    | 0    | 0     | 192  | 100  | 154  | 80.2  |
| mark         | 187   | 99      | 52.9 | 0    | 0    | 0    | 0     | 187  | 100  | 99   | 52.9  |
| advcl        | 128   | 29      | 22.7 | 91   | 71.1 | 18   | 19.8  | 37   | 28.9 | 11   | 29.7  |
| acl:relcl    | 121   | 42      | 34.7 | 121  | 100  | 42   | 34.7  | 0    | 0    | 0    | 0     |
| flat:name    | 116   | 100     | 86.2 | 116  | 100  | 100  | 86.2  | 0    | 0    | 0    | 0     |
| nummod       | 114   | 47      | 41.2 | 37   | 32.5 | 11   | 29.7  | 77   | 67.5 | 36   | 46.8  |
| acl          | 110   | 57      | 51.8 | 106  | 96.4 | 57   | 53.8  | 4    | 3.6  | 0    | 0     |
| aux:pass     | 105   | 84      | 80   | 0    | 0    | 0    | 0     | 105  | 100  | 84   | 80    |
| cop          | 105   | 65      | 61.9 | 27   | 25.7 | 24   | 88.9  | 78   | 74.3 | 41   | 52.6  |
| nsubj:pass   | 101   | 50      | 49.5 | 35   | 34.7 | 13   | 37.1  | 66   | 65.3 | 37   | 56.1  |
| expl         | 74    | 51      | 68.9 | 14   | 18.9 | 3    | 21.4  | 60   | 81.1 | 48   | 80    |
| xcomp        | 74    | 32      | 43.2 | 73   | 98.6 | 32   | 43.8  | 1    | 1.4  | 0    | 0     |
| det:poss     | 61    | 44      | 72.1 | 1    | 1.6  | 0    | 0     | 60   | 98.4 | 44   | 73.3  |
| obl:agent    | 46    | 23      | 50   | 44   | 95.7 | 23   | 52.3  | 2    | 4.3  | 0    | 0     |
| fixed        | 43    | 34      | 79.1 | 43   | 100  | 34   | 79.1  | 0    | 0    | 0    | 0     |
| appos        | 40    | 15      | 37.5 | 40   | 100  | 15   | 37.5  | 0    | 0    | 0    | 0     |
| ccomp        | 35    | 8       | 22.9 | 35   | 100  | 8    | 22.9  | 0    | 0    | 0    | 0     |
| compound     | 23    | 14      | 60.9 | 23   | 100  | 14   | 60.9  | 0    | 0    | 0    | 0     |
| flat         | 20    | 17      | 85   | 20   | 100  | 17   | 85    | 0    | 0    | 0    | 0     |
| expl:impers  | 20    | 17      | 85   | 0    | 0    | 0    | 0     | 20   | 100  | 17   | 85    |
| iobj         | 20    | 11      | 55   | 6    | 30   | 3    | 50    | 14   | 70   | 8    | 57.1  |
| det:predet   | 15    | 11      | 73.3 | 0    | 0    | 0    | 0     | 15   | 100  | 11   | 73.3  |
| parataxis    | 14    | 3       | 21.4 | 11   | 78.6 | 3    | 27.3  | 3    | 21.4 | 0    | 0     |
| expl:pass    | 11    | 8       | 72.7 | 1    | 9.1  | 0    | 0     | 10   | 90.9 | 8    | 80    |
| flat:foreign | 6     | 4       | 66.7 | 6    | 100  | 4    | 66.7  | 0    | 0    | 0    | 0     |
| csbj         | 3     | 1       | 33.3 | 3    | 100  | 1    | 33.3  | 0    | 0    | 0    | 0     |
| vocative     | 3     | 1       | 33.3 | 0    | 0    | 0    | 0     | 3    | 100  | 1    | 33.3  |
| dep          | 1     | 0       | 0    | 0    | 0    | 0    | 0     | 1    | 100  | 0    | 0     |
| dislocated   | 1     | 1       | 100  | 0    | 0    | 0    | 0     | 1    | 100  | 1    | 100   |
| total        | 9878  | 5511    | 55.8 | 4297 | 43.5 | 2055 | 47.8  | 5581 | 56.5 | 3456 | 61.9  |

Table 13: Italian. Exact match.

| deprel       | count | found-m | %    | HI   | HI%  | HI-m | HI-m% | HF   | HF%  | HF-m | HF-m% |
|--------------|-------|---------|------|------|------|------|-------|------|------|------|-------|
| det          | 1623  | 1338    | 82.4 | 0    | 0    | 0    | 0     | 1623 | 100  | 1338 | 82.4  |
| case         | 1535  | 1240    | 80.8 | 0    | 0    | 0    | 0     | 1535 | 100  | 1240 | 80.8  |
| punct        | 1170  | 706     | 60.3 | 952  | 81.4 | 587  | 61.7  | 218  | 18.6 | 119  | 54.6  |
| nmod         | 843   | 603     | 71.5 | 823  | 97.6 | 600  | 72.9  | 20   | 2.4  | 3    | 15    |
| obl          | 652   | 366     | 56.1 | 502  | 77   | 295  | 58.8  | 150  | 23   | 71   | 47.3  |
| amod         | 570   | 262     | 46   | 383  | 67.2 | 220  | 57.4  | 187  | 32.8 | 42   | 22.5  |
| nsubj        | 429   | 301     | 70.2 | 111  | 25.9 | 77   | 69.4  | 318  | 74.1 | 224  | 70.4  |
| advmod       | 365   | 181     | 49.6 | 70   | 19.2 | 17   | 24.3  | 295  | 80.8 | 164  | 55.6  |
| obj          | 336   | 245     | 72.9 | 295  | 87.8 | 219  | 74.2  | 41   | 12.2 | 26   | 63.4  |
| conj         | 304   | 148     | 48.7 | 304  | 100  | 148  | 48.7  | 0    | 0    | 0    | 0     |
| cc           | 262   | 178     | 67.9 | 4    | 1.5  | 0    | 0     | 258  | 98.5 | 178  | 69    |
| aux          | 192   | 175     | 91.1 | 0    | 0    | 0    | 0     | 192  | 100  | 175  | 91.1  |
| mark         | 187   | 122     | 65.2 | 0    | 0    | 0    | 0     | 187  | 100  | 122  | 65.2  |
| advcl        | 128   | 51      | 39.8 | 91   | 71.1 | 34   | 37.4  | 37   | 28.9 | 17   | 45.9  |
| acl:relcl    | 121   | 58      | 47.9 | 121  | 100  | 58   | 47.9  | 0    | 0    | 0    | 0     |
| flat:name    | 116   | 101     | 87.1 | 116  | 100  | 101  | 87.1  | 0    | 0    | 0    | 0     |
| nummod       | 114   | 50      | 43.9 | 37   | 32.5 | 11   | 29.7  | 77   | 67.5 | 39   | 50.6  |
| acl          | 110   | 71      | 64.5 | 106  | 96.4 | 71   | 67    | 4    | 3.6  | 0    | 0     |
| aux:pass     | 105   | 98      | 93.3 | 0    | 0    | 0    | 0     | 105  | 100  | 98   | 93.3  |
| cop          | 105   | 82      | 78.1 | 27   | 25.7 | 24   | 88.9  | 78   | 74.3 | 58   | 74.4  |
| nsubj:pass   | 101   | 66      | 65.3 | 35   | 34.7 | 17   | 48.6  | 66   | 65.3 | 49   | 74.2  |
| expl         | 74    | 54      | 73   | 14   | 18.9 | 3    | 21.4  | 60   | 81.1 | 51   | 85    |
| xcomp        | 74    | 43      | 58.1 | 73   | 98.6 | 43   | 58.9  | 1    | 1.4  | 0    | 0     |
| det:poss     | 61    | 48      | 78.7 | 1    | 1.6  | 0    | 0     | 60   | 98.4 | 48   | 80    |
| obl:agent    | 46    | 32      | 69.6 | 44   | 95.7 | 32   | 72.7  | 2    | 4.3  | 0    | 0     |
| fixed        | 43    | 34      | 79.1 | 43   | 100  | 34   | 79.1  | 0    | 0    | 0    | 0     |
| appos        | 40    | 20      | 50   | 40   | 100  | 20   | 50    | 0    | 0    | 0    | 0     |
| ccomp        | 35    | 11      | 31.4 | 35   | 100  | 11   | 31.4  | 0    | 0    | 0    | 0     |
| compound     | 23    | 18      | 78.3 | 23   | 100  | 18   | 78.3  | 0    | 0    | 0    | 0     |
| flat         | 20    | 17      | 85   | 20   | 100  | 17   | 85    | 0    | 0    | 0    | 0     |
| expl:impers  | 20    | 18      | 90   | 0    | 0    | 0    | 0     | 20   | 100  | 18   | 90    |
| iobj         | 20    | 12      | 60   | 6    | 30   | 3    | 50    | 14   | 70   | 9    | 64.3  |
| det:predet   | 15    | 12      | 80   | 0    | 0    | 0    | 0     | 15   | 100  | 12   | 80    |
| parataxis    | 14    | 6       | 42.9 | 11   | 78.6 | 6    | 54.5  | 3    | 21.4 | 0    | 0     |
| expl:pass    | 11    | 8       | 72.7 | 1    | 9.1  | 0    | 0     | 10   | 90.9 | 8    | 80    |
| flat:foreign | 6     | 5       | 83.3 | 6    | 100  | 5    | 83.3  | 0    | 0    | 0    | 0     |
| csbj         | 3     | 2       | 66.7 | 3    | 100  | 2    | 66.7  | 0    | 0    | 0    | 0     |
| vocative     | 3     | 2       | 66.7 | 0    | 0    | 0    | 0     | 3    | 100  | 2    | 66.7  |
| dep          | 1     | 0       | 0    | 0    | 0    | 0    | 0     | 1    | 100  | 0    | 0     |
| dislocated   | 1     | 1       | 100  | 0    | 0    | 0    | 0     | 1    | 100  | 1    | 100   |
| total        | 9878  | 6785    | 68.7 | 4297 | 43.5 | 2673 | 62.2  | 5581 | 56.5 | 4112 | 73.7  |

Table 14: Italian. Approximate match.

| deprel       | count | found-m | %    | HI   | HI%  | HI-m | HI-m% | HF   | HF%  | HF-m | HF-m% |
|--------------|-------|---------|------|------|------|------|-------|------|------|------|-------|
| punct        | 1191  | 419     | 35.2 | 886  | 74.4 | 317  | 35.8  | 305  | 25.6 | 102  | 33.4  |
| det          | 1185  | 845     | 71.3 | 0    | 0    | 0    | 0     | 1185 | 100  | 845  | 71.3  |
| case         | 1180  | 786     | 66.6 | 13   | 1.1  | 4    | 30.8  | 1167 | 98.9 | 782  | 67    |
| nmod         | 838   | 474     | 56.6 | 543  | 64.8 | 281  | 51.7  | 295  | 35.2 | 193  | 65.4  |
| nsubj        | 708   | 325     | 45.9 | 131  | 18.5 | 49   | 37.4  | 577  | 81.5 | 276  | 47.8  |
| obl          | 691   | 223     | 32.3 | 302  | 43.7 | 109  | 36.1  | 389  | 56.3 | 114  | 29.3  |
| obj          | 652   | 249     | 38.2 | 306  | 46.9 | 128  | 41.8  | 346  | 53.1 | 121  | 35    |
| advmod       | 596   | 197     | 33.1 | 169  | 28.4 | 56   | 33.1  | 427  | 71.6 | 141  | 33    |
| conj         | 428   | 146     | 34.1 | 428  | 100  | 146  | 34.1  | 0    | 0    | 0    | 0     |
| amod         | 410   | 303     | 73.9 | 19   | 4.6  | 2    | 10.5  | 391  | 95.4 | 301  | 77    |
| cc           | 357   | 190     | 53.2 | 1    | 0.3  | 0    | 0     | 356  | 99.7 | 190  | 53.4  |
| mark         | 336   | 147     | 43.8 | 16   | 4.8  | 4    | 25    | 320  | 95.2 | 143  | 44.7  |
| compound     | 326   | 232     | 71.2 | 319  | 97.9 | 231  | 72.4  | 7    | 2.1  | 1    | 14.3  |
| aux          | 291   | 98      | 33.7 | 76   | 26.1 | 8    | 10.5  | 215  | 73.9 | 90   | 41.9  |
| acl          | 209   | 85      | 40.7 | 103  | 49.3 | 24   | 23.3  | 106  | 50.7 | 61   | 57.5  |
| xcomp        | 199   | 78      | 39.2 | 184  | 92.5 | 77   | 41.8  | 15   | 7.5  | 1    | 6.7   |
| cop          | 193   | 107     | 55.4 | 78   | 40.4 | 44   | 56.4  | 115  | 59.6 | 63   | 54.8  |
| appos        | 150   | 82      | 54.7 | 149  | 99.3 | 81   | 54.4  | 1    | 0.7  | 1    | 100   |
| flat         | 149   | 110     | 73.8 | 149  | 100  | 110  | 73.8  | 0    | 0    | 0    | 0     |
| ccomp        | 120   | 26      | 21.7 | 103  | 85.8 | 23   | 22.3  | 17   | 14.2 | 3    | 17.6  |
| dep          | 108   | 23      | 21.3 | 108  | 100  | 23   | 21.3  | 0    | 0    | 0    | 0     |
| parataxis    | 97    | 18      | 18.6 | 97   | 100  | 18   | 18.6  | 0    | 0    | 0    | 0     |
| nummod       | 97    | 62      | 63.9 | 22   | 22.7 | 6    | 27.3  | 75   | 77.3 | 56   | 74.7  |
| compound:prt | 94    | 44      | 46.8 | 53   | 56.4 | 15   | 28.3  | 41   | 43.6 | 29   | 70.7  |
| advcl        | 87    | 8       | 9.2  | 52   | 59.8 | 3    | 5.8   | 35   | 40.2 | 5    | 14.3  |
| csubj        | 41    | 8       | 19.5 | 19   | 46.3 | 1    | 5.3   | 22   | 53.7 | 7    | 31.8  |
| iobj         | 23    | 8       | 34.8 | 1    | 4.3  | 1    | 100   | 22   | 95.7 | 7    | 31.8  |
| det:nummod   | 22    | 14      | 63.6 | 2    | 9.1  | 0    | 0     | 20   | 90.9 | 14   | 70    |
| expl:pv      | 16    | 8       | 50   | 8    | 50   | 5    | 62.5  | 8    | 50   | 3    | 37.5  |
| fixed        | 7     | 2       | 28.6 | 7    | 100  | 2    | 28.6  | 0    | 0    | 0    | 0     |
| total        | 10801 | 5317    | 49.2 | 4344 | 40.2 | 1768 | 40.7  | 6457 | 59.8 | 3549 | 55    |

Table 15: Dutch. Exact match.



| deprel       | count | found-m | %    | HI   | HI%  | HI-m | HI-m% | HF   | HF%  | HF-m | HF-m% |
|--------------|-------|---------|------|------|------|------|-------|------|------|------|-------|
| punct        | 1191  | 595     | 50   | 886  | 74.4 | 469  | 52.9  | 305  | 25.6 | 126  | 41.3  |
| det          | 1185  | 940     | 79.3 | 0    | 0    | 0    | 0     | 1185 | 100  | 940  | 79.3  |
| case         | 1180  | 929     | 78.7 | 13   | 1.1  | 4    | 30.8  | 1167 | 98.9 | 925  | 79.3  |
| nmod         | 838   | 565     | 67.4 | 543  | 64.8 | 358  | 65.9  | 295  | 35.2 | 207  | 70.2  |
| nsubj        | 708   | 396     | 55.9 | 131  | 18.5 | 56   | 42.7  | 577  | 81.5 | 340  | 58.9  |
| obl          | 691   | 311     | 45   | 302  | 43.7 | 142  | 47    | 389  | 56.3 | 169  | 43.4  |
| obj          | 652   | 321     | 49.2 | 306  | 46.9 | 171  | 55.9  | 346  | 53.1 | 150  | 43.4  |
| advmod       | 596   | 273     | 45.8 | 169  | 28.4 | 81   | 47.9  | 427  | 71.6 | 192  | 45    |
| conj         | 428   | 192     | 44.9 | 428  | 100  | 192  | 44.9  | 0    | 0    | 0    | 0     |
| amod         | 410   | 317     | 77.3 | 19   | 4.6  | 2    | 10.5  | 391  | 95.4 | 315  | 80.6  |
| cc           | 357   | 230     | 64.4 | 1    | 0.3  | 0    | 0     | 356  | 99.7 | 230  | 64.6  |
| mark         | 336   | 187     | 55.7 | 16   | 4.8  | 6    | 37.5  | 320  | 95.2 | 181  | 56.6  |
| compound     | 326   | 255     | 78.2 | 319  | 97.9 | 254  | 79.6  | 7    | 2.1  | 1    | 14.3  |
| aux          | 291   | 117     | 40.2 | 76   | 26.1 | 10   | 13.2  | 215  | 73.9 | 107  | 49.8  |
| acl          | 209   | 110     | 52.6 | 103  | 49.3 | 43   | 41.7  | 106  | 50.7 | 67   | 63.2  |
| xcomp        | 199   | 96      | 48.2 | 184  | 92.5 | 95   | 51.6  | 15   | 7.5  | 1    | 6.7   |
| cop          | 193   | 126     | 65.3 | 78   | 40.4 | 49   | 62.8  | 115  | 59.6 | 77   | 67    |
| appos        | 150   | 96      | 64   | 149  | 99.3 | 95   | 63.8  | 1    | 0.7  | 1    | 100   |
| flat         | 149   | 117     | 78.5 | 149  | 100  | 117  | 78.5  | 0    | 0    | 0    | 0     |
| ccomp        | 120   | 44      | 36.7 | 103  | 85.8 | 40   | 38.8  | 17   | 14.2 | 4    | 23.5  |
| dep          | 108   | 41      | 38   | 108  | 100  | 41   | 38    | 0    | 0    | 0    | 0     |
| parataxis    | 97    | 41      | 42.3 | 97   | 100  | 41   | 42.3  | 0    | 0    | 0    | 0     |
| nummod       | 97    | 65      | 67   | 22   | 22.7 | 7    | 31.8  | 75   | 77.3 | 58   | 77.3  |
| compound:prt | 94    | 55      | 58.5 | 53   | 56.4 | 23   | 43.4  | 41   | 43.6 | 32   | 78    |
| advcl        | 87    | 13      | 14.9 | 52   | 59.8 | 7    | 13.5  | 35   | 40.2 | 6    | 17.1  |
| csubj        | 41    | 14      | 34.1 | 19   | 46.3 | 4    | 21.1  | 22   | 53.7 | 10   | 45.5  |
| iobj         | 23    | 9       | 39.1 | 1    | 4.3  | 1    | 100   | 22   | 95.7 | 8    | 36.4  |
| det:nummod   | 22    | 16      | 72.7 | 2    | 9.1  | 0    | 0     | 20   | 90.9 | 16   | 80    |
| expl:pv      | 16    | 8       | 50   | 8    | 50   | 5    | 62.5  | 8    | 50   | 3    | 37.5  |
| fixed        | 7     | 2       | 28.6 | 7    | 100  | 2    | 28.6  | 0    | 0    | 0    | 0     |
| total        | 10801 | 6481    | 60   | 4344 | 40.2 | 2315 | 53.3  | 6457 | 59.8 | 4166 | 64.5  |

Table 16: Dutch. Approximate match.

| deprel       | count | found-m | %    | HI   | HI%  | HI-m | HI-m% | HF   | HF%  | HF-m | HF-m% |
|--------------|-------|---------|------|------|------|------|-------|------|------|------|-------|
| det          | 1552  | 1142    | 73.6 | 11   | 0.7  | 2    | 18.2  | 1541 | 99.3 | 1140 | 74    |
| case         | 1491  | 992     | 66.5 | 7    | 0.5  | 3    | 42.9  | 1484 | 99.5 | 989  | 66.6  |
| punct        | 1336  | 541     | 40.5 | 944  | 70.7 | 395  | 41.8  | 392  | 29.3 | 146  | 37.2  |
| nmod         | 850   | 444     | 52.2 | 829  | 97.5 | 441  | 53.2  | 21   | 2.5  | 3    | 14.3  |
| obl          | 563   | 242     | 43   | 458  | 81.3 | 196  | 42.8  | 105  | 18.7 | 46   | 43.8  |
| nsubj        | 517   | 289     | 55.9 | 55   | 10.6 | 10   | 18.2  | 462  | 89.4 | 279  | 60.4  |
| obj          | 383   | 220     | 57.4 | 347  | 90.6 | 207  | 59.7  | 36   | 9.4  | 13   | 36.1  |
| advmod       | 353   | 113     | 32   | 99   | 28   | 22   | 22.2  | 254  | 72   | 91   | 35.8  |
| amod         | 323   | 135     | 41.8 | 229  | 70.9 | 117  | 51.1  | 94   | 29.1 | 18   | 19.1  |
| flat:name    | 283   | 194     | 68.6 | 283  | 100  | 194  | 68.6  | 0    | 0    | 0    | 0     |
| conj         | 243   | 71      | 29.2 | 242  | 99.6 | 71   | 29.3  | 1    | 0.4  | 0    | 0     |
| mark         | 209   | 94      | 45   | 1    | 0.5  | 0    | 0     | 208  | 99.5 | 94   | 45.2  |
| cc           | 199   | 105     | 52.8 | 11   | 5.5  | 2    | 18.2  | 188  | 94.5 | 103  | 54.8  |
| appos        | 196   | 94      | 48   | 196  | 100  | 94   | 48    | 0    | 0    | 0    | 0     |
| acl          | 147   | 70      | 47.6 | 145  | 98.6 | 70   | 48.3  | 2    | 1.4  | 0    | 0     |
| nummod       | 137   | 71      | 51.8 | 27   | 19.7 | 2    | 7.4   | 110  | 80.3 | 69   | 62.7  |
| cop          | 116   | 75      | 64.7 | 4    | 3.4  | 0    | 0     | 112  | 96.6 | 75   | 67    |
| acl:relcl    | 105   | 36      | 34.3 | 103  | 98.1 | 35   | 34    | 2    | 1.9  | 1    | 50    |
| advcl        | 102   | 19      | 18.6 | 85   | 83.3 | 18   | 21.2  | 17   | 16.7 | 1    | 5.9   |
| aux          | 100   | 70      | 70   | 1    | 1    | 0    | 0     | 99   | 99   | 70   | 70.7  |
| ccomp        | 72    | 23      | 31.9 | 56   | 77.8 | 22   | 39.3  | 16   | 22.2 | 1    | 6.2   |
| xcomp        | 61    | 26      | 42.6 | 58   | 95.1 | 26   | 44.8  | 3    | 4.9  | 0    | 0     |
| aux:pass     | 57    | 47      | 82.5 | 0    | 0    | 0    | 0     | 57   | 100  | 47   | 82.5  |
| dep          | 55    | 20      | 36.4 | 39   | 70.9 | 15   | 38.5  | 16   | 29.1 | 5    | 31.2  |
| nsubj:pass   | 49    | 25      | 51   | 6    | 12.2 | 2    | 33.3  | 43   | 87.8 | 23   | 53.5  |
| expl         | 35    | 17      | 48.6 | 10   | 28.6 | 7    | 70    | 25   | 71.4 | 10   | 40    |
| obl:agent    | 31    | 19      | 61.3 | 31   | 100  | 19   | 61.3  | 0    | 0    | 0    | 0     |
| compound     | 28    | 12      | 42.9 | 25   | 89.3 | 12   | 48    | 3    | 10.7 | 0    | 0     |
| nmod:npmode  | 25    | 14      | 56   | 19   | 76   | 14   | 73.7  | 6    | 24   | 0    | 0     |
| fixed        | 24    | 16      | 66.7 | 19   | 79.2 | 13   | 68.4  | 5    | 20.8 | 3    | 60    |
| parataxis    | 20    | 6       | 30   | 20   | 100  | 6    | 30    | 0    | 0    | 0    | 0     |
| nmod:tmod    | 12    | 7       | 58.3 | 11   | 91.7 | 7    | 63.6  | 1    | 8.3  | 0    | 0     |
| csbj         | 11    | 0       | 0    | 9    | 81.8 | 0    | 0     | 2    | 18.2 | 0    | 0     |
| iobj         | 7     | 3       | 42.9 | 4    | 57.1 | 2    | 50    | 3    | 42.9 | 1    | 33.3  |
| flat:foreign | 4     | 1       | 25   | 4    | 100  | 1    | 25    | 0    | 0    | 0    | 0     |
| vocative     | 3     | 0       | 0    | 3    | 100  | 0    | 0     | 0    | 0    | 0    | 0     |
| flat         | 2     | 1       | 50   | 2    | 100  | 1    | 50    | 0    | 0    | 0    | 0     |
| dislocated   | 1     | 0       | 0    | 0    | 0    | 0    | 0     | 1    | 100  | 0    | 0     |
| total        | 9702  | 5254    | 54.2 | 4393 | 45.3 | 2026 | 46.1  | 5309 | 54.7 | 3228 | 60.8  |

Table 17: Portuguese. Exact match.

| deprel       | count | found-m | %    | HI   | HI%  | HI-m | HI-m% | HF   | HF%  | HF-m | HF-m% |
|--------------|-------|---------|------|------|------|------|-------|------|------|------|-------|
| det          | 1552  | 1236    | 79.6 | 11   | 0.7  | 3    | 27.3  | 1541 | 99.3 | 1233 | 80    |
| case         | 1491  | 1200    | 80.5 | 7    | 0.5  | 3    | 42.9  | 1484 | 99.5 | 1197 | 80.7  |
| punct        | 1336  | 723     | 54.1 | 944  | 70.7 | 540  | 57.2  | 392  | 29.3 | 183  | 46.7  |
| nmod         | 850   | 600     | 70.6 | 829  | 97.5 | 597  | 72    | 21   | 2.5  | 3    | 14.3  |
| obl          | 563   | 341     | 60.6 | 458  | 81.3 | 278  | 60.7  | 105  | 18.7 | 63   | 60    |
| nsubj        | 517   | 373     | 72.1 | 55   | 10.6 | 17   | 30.9  | 462  | 89.4 | 356  | 77.1  |
| obj          | 383   | 281     | 73.4 | 347  | 90.6 | 260  | 74.9  | 36   | 9.4  | 21   | 58.3  |
| advmod       | 353   | 138     | 39.1 | 99   | 28   | 25   | 25.3  | 254  | 72   | 113  | 44.5  |
| amod         | 323   | 141     | 43.7 | 229  | 70.9 | 121  | 52.8  | 94   | 29.1 | 20   | 21.3  |
| flat:name    | 283   | 201     | 71   | 283  | 100  | 201  | 71    | 0    | 0    | 0    | 0     |
| conj         | 243   | 116     | 47.7 | 242  | 99.6 | 116  | 47.9  | 1    | 0.4  | 0    | 0     |
| mark         | 209   | 126     | 60.3 | 1    | 0.5  | 0    | 0     | 208  | 99.5 | 126  | 60.6  |
| cc           | 199   | 139     | 69.8 | 11   | 5.5  | 4    | 36.4  | 188  | 94.5 | 135  | 71.8  |
| appos        | 196   | 119     | 60.7 | 196  | 100  | 119  | 60.7  | 0    | 0    | 0    | 0     |
| acl          | 147   | 93      | 63.3 | 145  | 98.6 | 93   | 64.1  | 2    | 1.4  | 0    | 0     |
| nummod       | 137   | 76      | 55.5 | 27   | 19.7 | 3    | 11.1  | 110  | 80.3 | 73   | 66.4  |
| cop          | 116   | 93      | 80.2 | 4    | 3.4  | 0    | 0     | 112  | 96.6 | 93   | 83    |
| acl:relcl    | 105   | 54      | 51.4 | 103  | 98.1 | 53   | 51.5  | 2    | 1.9  | 1    | 50    |
| advcl        | 102   | 28      | 27.5 | 85   | 83.3 | 25   | 29.4  | 17   | 16.7 | 3    | 17.6  |
| aux          | 100   | 83      | 83   | 1    | 1    | 0    | 0     | 99   | 99   | 83   | 83.8  |
| ccomp        | 72    | 35      | 48.6 | 56   | 77.8 | 29   | 51.8  | 16   | 22.2 | 6    | 37.5  |
| xcomp        | 61    | 34      | 55.7 | 58   | 95.1 | 34   | 58.6  | 3    | 4.9  | 0    | 0     |
| aux:pass     | 57    | 50      | 87.7 | 0    | 0    | 0    | 0     | 57   | 100  | 50   | 87.7  |
| dep          | 55    | 27      | 49.1 | 39   | 70.9 | 21   | 53.8  | 16   | 29.1 | 6    | 37.5  |
| nsubj:pass   | 49    | 33      | 67.3 | 6    | 12.2 | 2    | 33.3  | 43   | 87.8 | 31   | 72.1  |
| expl         | 35    | 18      | 51.4 | 10   | 28.6 | 7    | 70    | 25   | 71.4 | 11   | 44    |
| obl:agent    | 31    | 23      | 74.2 | 31   | 100  | 23   | 74.2  | 0    | 0    | 0    | 0     |
| compound     | 28    | 12      | 42.9 | 25   | 89.3 | 12   | 48    | 3    | 10.7 | 0    | 0     |
| nmod:npmode  | 25    | 16      | 64   | 19   | 76   | 16   | 84.2  | 6    | 24   | 0    | 0     |
| fixed        | 24    | 16      | 66.7 | 19   | 79.2 | 13   | 68.4  | 5    | 20.8 | 3    | 60    |
| parataxis    | 20    | 7       | 35   | 20   | 100  | 7    | 35    | 0    | 0    | 0    | 0     |
| nmod:tmod    | 12    | 7       | 58.3 | 11   | 91.7 | 7    | 63.6  | 1    | 8.3  | 0    | 0     |
| csbj         | 11    | 2       | 18.2 | 9    | 81.8 | 2    | 22.2  | 2    | 18.2 | 0    | 0     |
| iobj         | 7     | 3       | 42.9 | 4    | 57.1 | 2    | 50    | 3    | 42.9 | 1    | 33.3  |
| flat:foreign | 4     | 2       | 50   | 4    | 100  | 2    | 50    | 0    | 0    | 0    | 0     |
| vocative     | 3     | 0       | 0    | 3    | 100  | 0    | 0     | 0    | 0    | 0    | 0     |
| flat         | 2     | 1       | 50   | 2    | 100  | 1    | 50    | 0    | 0    | 0    | 0     |
| dislocated   | 1     | 0       | 0    | 0    | 0    | 0    | 0     | 1    | 100  | 0    | 0     |
| total        | 9702  | 6447    | 66.5 | 4393 | 45.3 | 2636 | 60    | 5309 | 54.7 | 3811 | 71.8  |

Table 18: Portuguese. Approximate match.

| deprel        | count  | found-m | %    | HI    | HI%  | HI-m  | HI-m% | HF    | HF%  | HF-m  | HF-m% |
|---------------|--------|---------|------|-------|------|-------|-------|-------|------|-------|-------|
| punct         | 20708  | 16911   | 81.7 | 18881 | 91.2 | 15916 | 84.3  | 1827  | 8.8  | 995   | 54.5  |
| amod          | 11954  | 9457    | 79.1 | 814   | 6.8  | 424   | 52.1  | 11140 | 93.2 | 9033  | 81.1  |
| nmod          | 11100  | 7836    | 70.6 | 10202 | 91.9 | 7409  | 72.6  | 898   | 8.1  | 427   | 47.6  |
| case          | 10972  | 9243    | 84.2 | 18    | 0.2  | 3     | 16.7  | 10954 | 99.8 | 9240  | 84.4  |
| obl           | 8412   | 4734    | 56.3 | 5358  | 63.7 | 3229  | 60.3  | 3054  | 36.3 | 1505  | 49.3  |
| nsubj         | 8084   | 5221    | 64.6 | 2314  | 28.6 | 1477  | 63.8  | 5770  | 71.4 | 3744  | 64.9  |
| advmod        | 7767   | 4554    | 58.6 | 1292  | 16.6 | 557   | 43.1  | 6475  | 83.4 | 3997  | 61.7  |
| conj          | 5398   | 2950    | 54.6 | 5391  | 99.9 | 2947  | 54.7  | 7     | 0.1  | 3     | 42.9  |
| cc            | 4709   | 3275    | 69.5 | 331   | 7    | 223   | 67.4  | 4378  | 93   | 3052  | 69.7  |
| obj           | 3584   | 2329    | 65   | 2919  | 81.4 | 2051  | 70.3  | 665   | 18.6 | 278   | 41.8  |
| parataxis     | 2131   | 1167    | 54.8 | 1242  | 58.3 | 600   | 48.3  | 889   | 41.7 | 567   | 63.8  |
| nummod        | 1890   | 1235    | 65.3 | 551   | 29.2 | 203   | 36.8  | 1339  | 70.8 | 1032  | 77.1  |
| advcl         | 1783   | 898     | 50.4 | 1309  | 73.4 | 673   | 51.4  | 474   | 26.6 | 225   | 47.5  |
| mark          | 1317   | 932     | 70.8 | 905   | 68.7 | 708   | 78.2  | 412   | 31.3 | 224   | 54.4  |
| appos         | 930    | 616     | 66.2 | 922   | 99.1 | 614   | 66.6  | 8     | 0.9  | 2     | 25    |
| fixed         | 890    | 754     | 84.7 | 844   | 94.8 | 732   | 86.7  | 46    | 5.2  | 22    | 47.8  |
| xcomp         | 841    | 570     | 67.8 | 796   | 94.6 | 559   | 70.2  | 45    | 5.4  | 11    | 24.4  |
| acl:relcl     | 715    | 436     | 61   | 713   | 99.7 | 434   | 60.9  | 2     | 0.3  | 2     | 100   |
| flat:name     | 707    | 608     | 86   | 707   | 100  | 608   | 86    | 0     | 0    | 0     | 0     |
| cop           | 631    | 387     | 61.3 | 230   | 36.5 | 152   | 66.1  | 401   | 63.5 | 235   | 58.6  |
| nsubj:pass    | 587    | 395     | 67.3 | 219   | 37.3 | 148   | 67.6  | 368   | 62.7 | 247   | 67.1  |
| nummod:gov    | 492    | 349     | 70.9 | 44    | 8.9  | 14    | 31.8  | 448   | 91.1 | 335   | 74.8  |
| dep           | 415    | 283     | 68.2 | 404   | 97.3 | 282   | 69.8  | 11    | 2.7  | 1     | 9.1   |
| aux:pass      | 373    | 303     | 81.2 | 11    | 2.9  | 2     | 18.2  | 362   | 97.1 | 301   | 83.1  |
| aux           | 228    | 154     | 67.5 | 75    | 32.9 | 61    | 81.3  | 153   | 67.1 | 93    | 60.8  |
| flat:foreign  | 220    | 134     | 60.9 | 218   | 99.1 | 133   | 61    | 2     | 0.9  | 1     | 50    |
| acl           | 186    | 83      | 44.6 | 117   | 62.9 | 51    | 43.6  | 69    | 37.1 | 32    | 46.4  |
| obl:agent     | 174    | 111     | 63.8 | 159   | 91.4 | 106   | 66.7  | 15    | 8.6  | 5     | 33.3  |
| iobj          | 163    | 85      | 52.1 | 98    | 60.1 | 61    | 62.2  | 65    | 39.9 | 24    | 36.9  |
| ccomp         | 101    | 52      | 51.5 | 93    | 92.1 | 48    | 51.6  | 8     | 7.9  | 4     | 50    |
| compound      | 57     | 35      | 61.4 | 0     | 0    | 0     | 0     | 57    | 100  | 35    | 61.4  |
| discourse     | 47     | 24      | 51.1 | 4     | 8.5  | 0     | 0     | 43    | 91.5 | 24    | 55.8  |
| nummod:entity | 7      | 6       | 85.7 | 7     | 100  | 6     | 85.7  | 0     | 0    | 0     | 0     |
| flat          | 3      | 2       | 66.7 | 3     | 100  | 2     | 66.7  | 0     | 0    | 0     | 0     |
| vocative      | 2      | 1       | 50   | 1     | 50   | 1     | 100   | 1     | 50   | 0     | 0     |
| expl          | 1      | 0       | 0    | 0     | 0    | 0     | 0     | 1     | 100  | 0     | 0     |
| total         | 107579 | 76130   | 70.8 | 57192 | 53.2 | 40434 | 70.7  | 50387 | 46.8 | 35696 | 70.8  |

Table 19: Russian. Exact match.

| deprel        | count  | found-m | %    | HI    | HI%  | HI-m  | HI-m% | HF    | HF%  | HF-m  | HF-m% |
|---------------|--------|---------|------|-------|------|-------|-------|-------|------|-------|-------|
| punct         | 20708  | 17718   | 85.6 | 18881 | 91.2 | 16610 | 88    | 1827  | 8.8  | 1108  | 60.6  |
| amod          | 11954  | 10156   | 85   | 814   | 6.8  | 483   | 59.3  | 11140 | 93.2 | 9673  | 86.8  |
| nmod          | 11100  | 9257    | 83.4 | 10202 | 91.9 | 8701  | 85.3  | 898   | 8.1  | 556   | 61.9  |
| case          | 10972  | 9898    | 90.2 | 18    | 0.2  | 3     | 16.7  | 10954 | 99.8 | 9895  | 90.3  |
| obl           | 8412   | 5817    | 69.2 | 5358  | 63.7 | 3881  | 72.4  | 3054  | 36.3 | 1936  | 63.4  |
| nsubj         | 8084   | 6352    | 78.6 | 2314  | 28.6 | 1727  | 74.6  | 5770  | 71.4 | 4625  | 80.2  |
| advmod        | 7767   | 5428    | 69.9 | 1292  | 16.6 | 678   | 52.5  | 6475  | 83.4 | 4750  | 73.4  |
| conj          | 5398   | 3793    | 70.3 | 5391  | 99.9 | 3789  | 70.3  | 7     | 0.1  | 4     | 57.1  |
| cc            | 4709   | 3803    | 80.8 | 331   | 7    | 246   | 74.3  | 4378  | 93   | 3557  | 81.2  |
| obj           | 3584   | 2643    | 73.7 | 2919  | 81.4 | 2298  | 78.7  | 665   | 18.6 | 345   | 51.9  |
| parataxis     | 2131   | 1469    | 68.9 | 1242  | 58.3 | 794   | 63.9  | 889   | 41.7 | 675   | 75.9  |
| nummod        | 1890   | 1356    | 71.7 | 551   | 29.2 | 251   | 45.6  | 1339  | 70.8 | 1105  | 82.5  |
| advcl         | 1783   | 1173    | 65.8 | 1309  | 73.4 | 880   | 67.2  | 474   | 26.6 | 293   | 61.8  |
| mark          | 1317   | 1052    | 79.9 | 905   | 68.7 | 763   | 84.3  | 412   | 31.3 | 289   | 70.1  |
| appos         | 930    | 731     | 78.6 | 922   | 99.1 | 727   | 78.9  | 8     | 0.9  | 4     | 50    |
| fixed         | 890    | 763     | 85.7 | 844   | 94.8 | 737   | 87.3  | 46    | 5.2  | 26    | 56.5  |
| xcomp         | 841    | 654     | 77.8 | 796   | 94.6 | 639   | 80.3  | 45    | 5.4  | 15    | 33.3  |
| acl:relcl     | 715    | 529     | 74   | 713   | 99.7 | 527   | 73.9  | 2     | 0.3  | 2     | 100   |
| flat:name     | 707    | 623     | 88.1 | 707   | 100  | 623   | 88.1  | 0     | 0    | 0     | 0     |
| cop           | 631    | 470     | 74.5 | 230   | 36.5 | 168   | 73    | 401   | 63.5 | 302   | 75.3  |
| nsubj:pass    | 587    | 461     | 78.5 | 219   | 37.3 | 171   | 78.1  | 368   | 62.7 | 290   | 78.8  |
| nummod:gov    | 492    | 381     | 77.4 | 44    | 8.9  | 17    | 38.6  | 448   | 91.1 | 364   | 81.2  |
| dep           | 415    | 329     | 79.3 | 404   | 97.3 | 328   | 81.2  | 11    | 2.7  | 1     | 9.1   |
| aux:pass      | 373    | 334     | 89.5 | 11    | 2.9  | 3     | 27.3  | 362   | 97.1 | 331   | 91.4  |
| aux           | 228    | 174     | 76.3 | 75    | 32.9 | 62    | 82.7  | 153   | 67.1 | 112   | 73.2  |
| flat:foreign  | 220    | 160     | 72.7 | 218   | 99.1 | 159   | 72.9  | 2     | 0.9  | 1     | 50    |
| acl           | 186    | 124     | 66.7 | 117   | 62.9 | 80    | 68.4  | 69    | 37.1 | 44    | 63.8  |
| obl:agent     | 174    | 125     | 71.8 | 159   | 91.4 | 118   | 74.2  | 15    | 8.6  | 7     | 46.7  |
| iobj          | 163    | 106     | 65   | 98    | 60.1 | 68    | 69.4  | 65    | 39.9 | 38    | 58.5  |
| ccomp         | 101    | 70      | 69.3 | 93    | 92.1 | 64    | 68.8  | 8     | 7.9  | 6     | 75    |
| compound      | 57     | 42      | 73.7 | 0     | 0    | 0     | 0     | 57    | 100  | 42    | 73.7  |
| discourse     | 47     | 29      | 61.7 | 4     | 8.5  | 0     | 0     | 43    | 91.5 | 29    | 67.4  |
| nummod:entity | 7      | 6       | 85.7 | 7     | 100  | 6     | 85.7  | 0     | 0    | 0     | 0     |
| flat          | 3      | 2       | 66.7 | 3     | 100  | 2     | 66.7  | 0     | 0    | 0     | 0     |
| vocative      | 2      | 1       | 50   | 1     | 50   | 1     | 100   | 1     | 50   | 0     | 0     |
| expl          | 1      | 0       | 0    | 0     | 0    | 0     | 0     | 1     | 100  | 0     | 0     |
| total         | 107579 | 86029   | 80   | 57192 | 53.2 | 45604 | 79.7  | 50387 | 46.8 | 40425 | 80.2  |

Table 20: Russian. Approximate match.
